# Supplementary material for: Photoredox-Catalyzed Synthesis of 3-Sulfonylated Pyrrolin-2-ones via a Regioselective Tandem Sulfonylation Cyclization of 1,5-Dienes
Source: MDPI journal article supplement (doi:10.3390/molecules28145473), 2023-07-17

# Photoredox-Catalyzed Synthesis of 3-Sulfonylated Pyrrolin-2-ones via a Regioselective Tandem Sulfonylation Cyclization of 1,5-Dienes

Ran Ding <sup>1,\*</sup>, Liang Li <sup>1</sup>, Ya-Ting Yu <sup>1</sup>, Bing Zhang <sup>1</sup> and Pei-Long Wang <sup>2,3,\*</sup>

<sup>1</sup> College of Chemistry and Materials Engineering, Anhui Science and Technology University, Bengbu 233100, China; ll15855863179@126.com (L.L.); yyt2747196669@126.com (Y.-T.Y.); zhangbing2168@126.com (B.Z.)

<sup>2</sup> Key Laboratory of Green and Precise Synthetic Chemistry and Applications, Ministry of Education, School of Chemistry and Materials Science, Huaibei Normal University, Huaibei 235000, China

<sup>3</sup> Information College, Huaibei Normal University, Huaibei 235000, China

\* Correspondence: dingran@mail.ustc.edu.cn (R.D.); wangpl@chnu.edu.cn (P.-L.W.)

---

## Table of Contents

|                                                                           |    |
|---------------------------------------------------------------------------|----|
| S1. General information .....                                             | 1  |
| S2. Procedure for the synthesis of compound <b>3a – 3p, 4a – 4o</b> ..... | 2  |
| S3. Procedures for the formation of compound <b>4aa</b> .....             | 4  |
| S4. The Transformation with the Light ON/OFF over Time.....               | 4  |
| S5. The radical trapping reaction residue.....                            | 4  |
| S6. NMR spectra for the products.....                                     | 19 |

## S1. General information

All the reagents purchased from Leyan company were directly used. <sup>1</sup>H-NMR and <sup>13</sup>C-NMR spectra of the products were recorded on a Bruker FT-NMR 400M or 600M spectrometers. Chemical shifts spectra are given as  $\delta$  in the units of parts per million (ppm) with reference to tetramethylsilane (TMS). Multiplicities were indicated as follows: d (doublet); s (singlet); t (triplet); q (quartet); m (multiplets) and etc. Coupling constants are reported as a J value in Hz. High resolution mass spectral analysis (HRMS) of the products were collected on an Agilent Technologies 6540 UHD Accurate-Mass Q-TOF LC/MS (ESI) instrument.

## S2. Procedure for the synthesis of compound 3a – 3p, 4a – 4o.

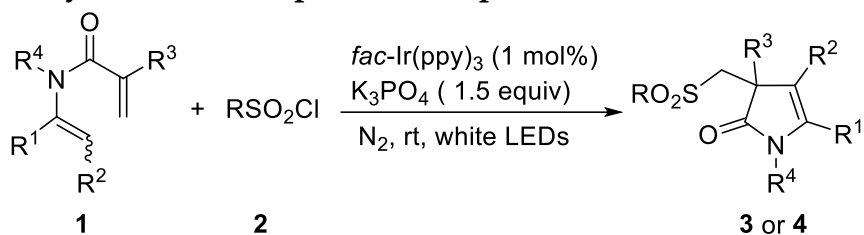

A dry 25-mL Schlenk tube containing a magnetic stirring bar was charged with 1,5-dienes **1** (0.1 mmol), sulfonyl chlorides **2** (0.2 mmol), *fac*-Ir(ppy)<sub>3</sub> (1 mol%), K<sub>3</sub>PO<sub>4</sub> (1.5 equiv), and CH<sub>2</sub>Cl<sub>2</sub> (1 mL). Then the mixture was irradiated with white LEDs at room temperature under N<sub>2</sub> for 16 h. After finishing, the reaction mixture was concentrated on a rotary evaporator and the residue was directly subjected to flash column chromatography on silica gel with (10-40% EtOAc/Petroleum ether) as eluate to furnish the desired product.

## S3. Procedures for the formation of 4aa

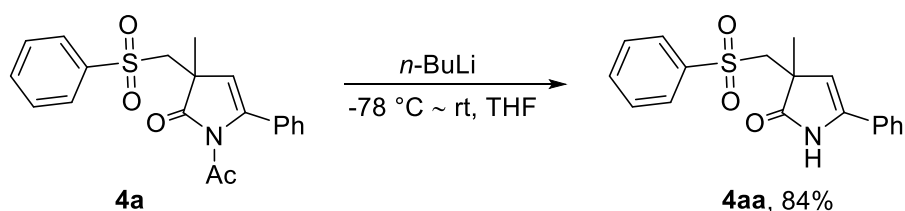

*n*-BuLi (2.5 M, 0.24 mmol) was slowly added to the solution of compound **4a** (0.2 mmol) and THF (8 mL) at -78 °C. After 15 minutes the reaction has risen to room temperature. After completing, 8 mL water was added to quench the reaction. Then, the mixture was extracted with 10 mL dichloromethane for 3 times. The combined dichloromethane were dried over CaCl<sub>2</sub>, concentrated in vacuo and purified by flash column chromatography (30% EtOAc/Petroleum ether) to furnish the desired product **4aa** (84% yield).

## S4. The Transformation with the Light ON/OFF over Time

The reaction mixture was stirred for 60 min with light-off. All of the following yields were analyzed in the identical way after a 60 min light on or off.

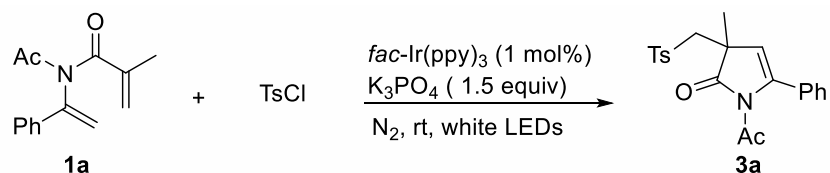

| Time (h)  | 0   | 1  | 2   | 3  | 4   | 5  | 6   |
|-----------|-----|----|-----|----|-----|----|-----|
| On/off    | off | on | off | on | off | on | off |
| Yield (%) | 0   | 26 | 26  | 46 | 46  | 62 | 62  |

## S5. The radical trapping reaction residue was analyzed by high resolution mass spectrometry (HRMS)

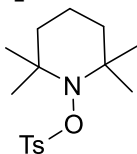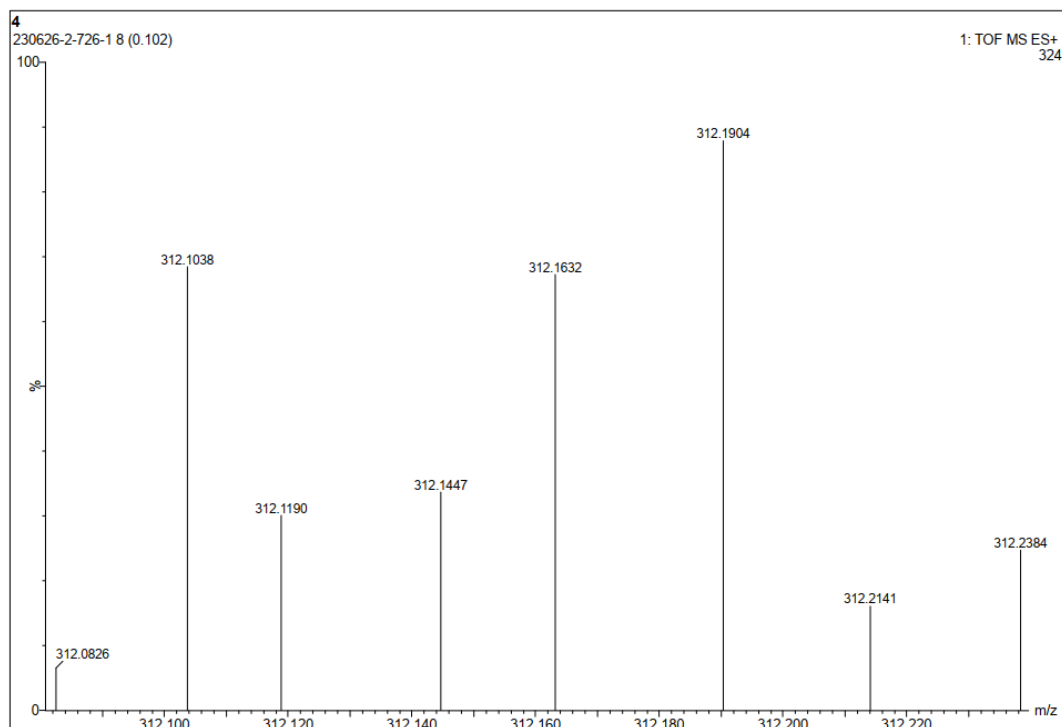

### Single Mass Analysis

Tolerance = 5.0 mDa / DBE: min = -1.5, max = 50.0

Element prediction: Off

Number of isotope peaks used for i-FIT = 3

Monoisotopic Mass, Even Electron Ions

459 formula(e) evaluated with 1 results within limits (all results (up to 1000) for each mass)

Elements Used:

C: 16-16 H: 4-50 N: 0-200 O: 0-200 S: 1-3

4

230626-2-726-1 8 (0.102)

1: TOF MS ES+  
2.85e+002

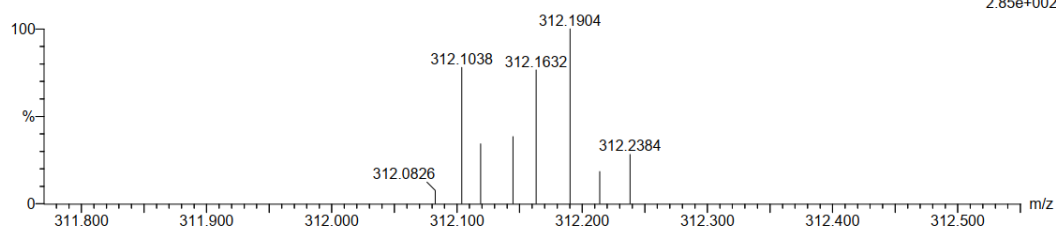

Minimum: -1.5  
Maximum: 5.0 10.0 50.0

| Mass     | Calc. Mass | mDa  | PPM  | DBE | i-FIT | Norm | Conf (%) | Formula        |
|----------|------------|------|------|-----|-------|------|----------|----------------|
| 312.1632 | 312.1633   | -0.1 | -0.3 | 4.5 | 47.5  | n/a  | n/a      | C16 H26 N O3 S |

## S6. NMR spectra

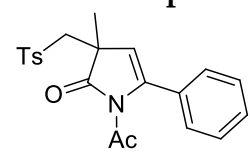

**3a**

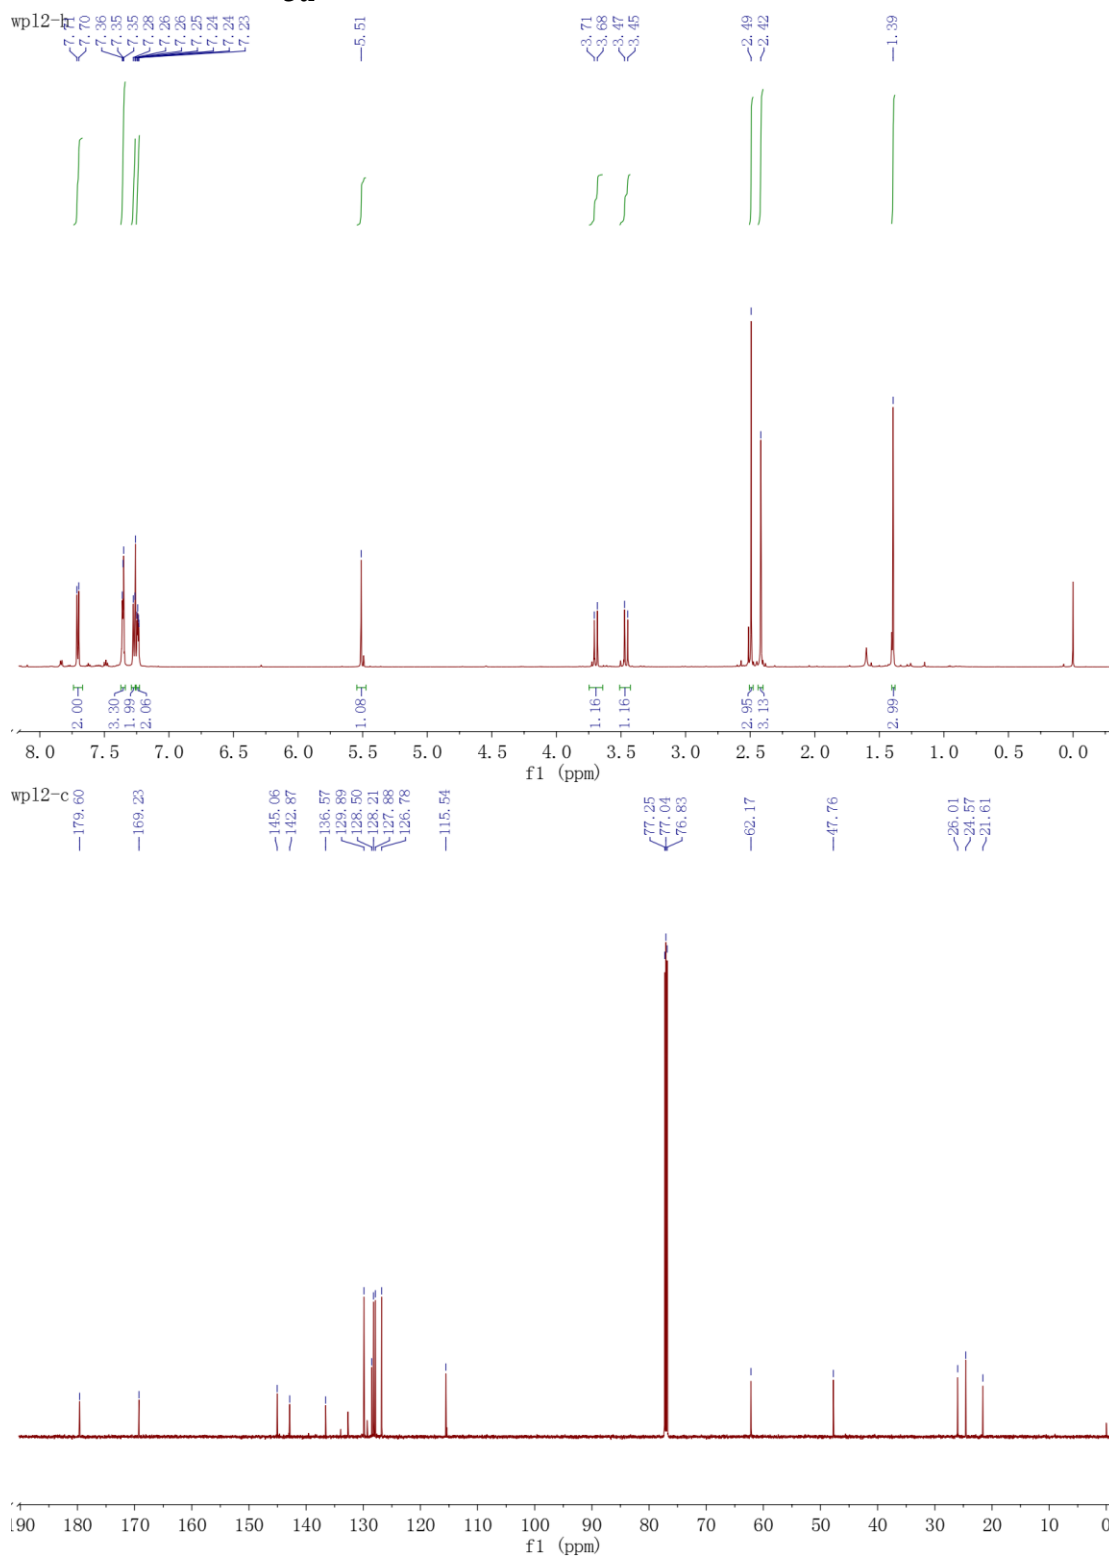

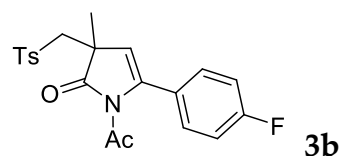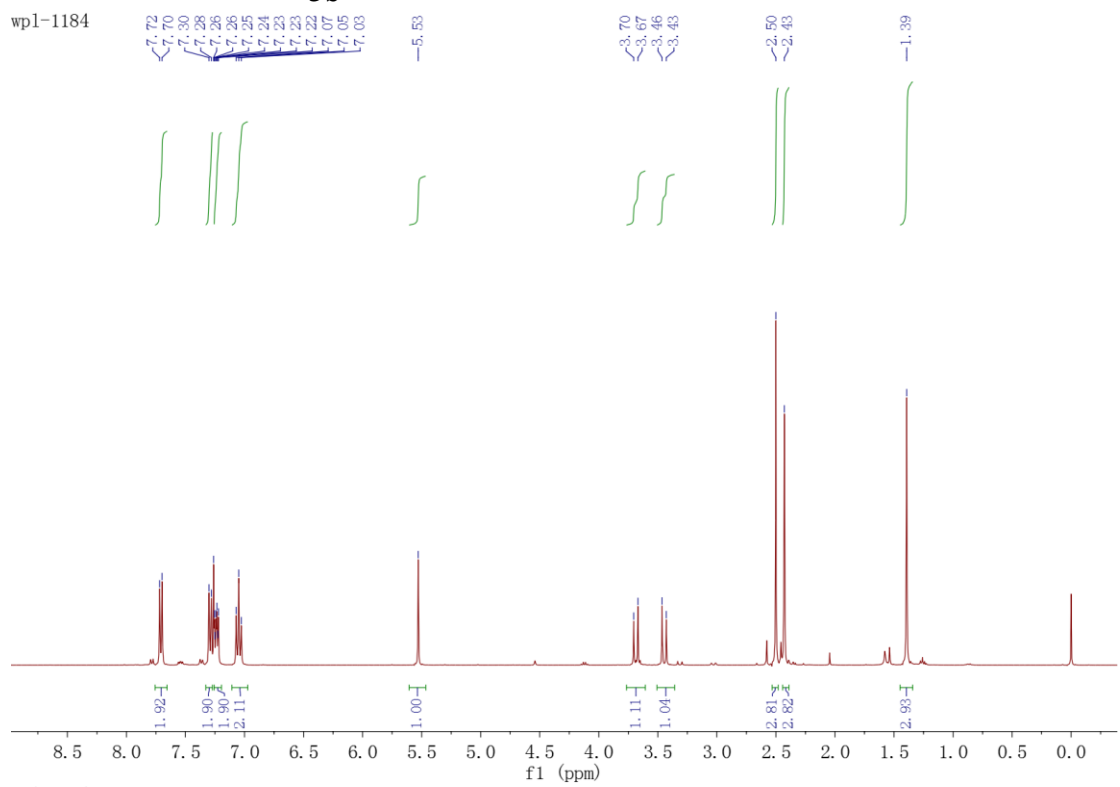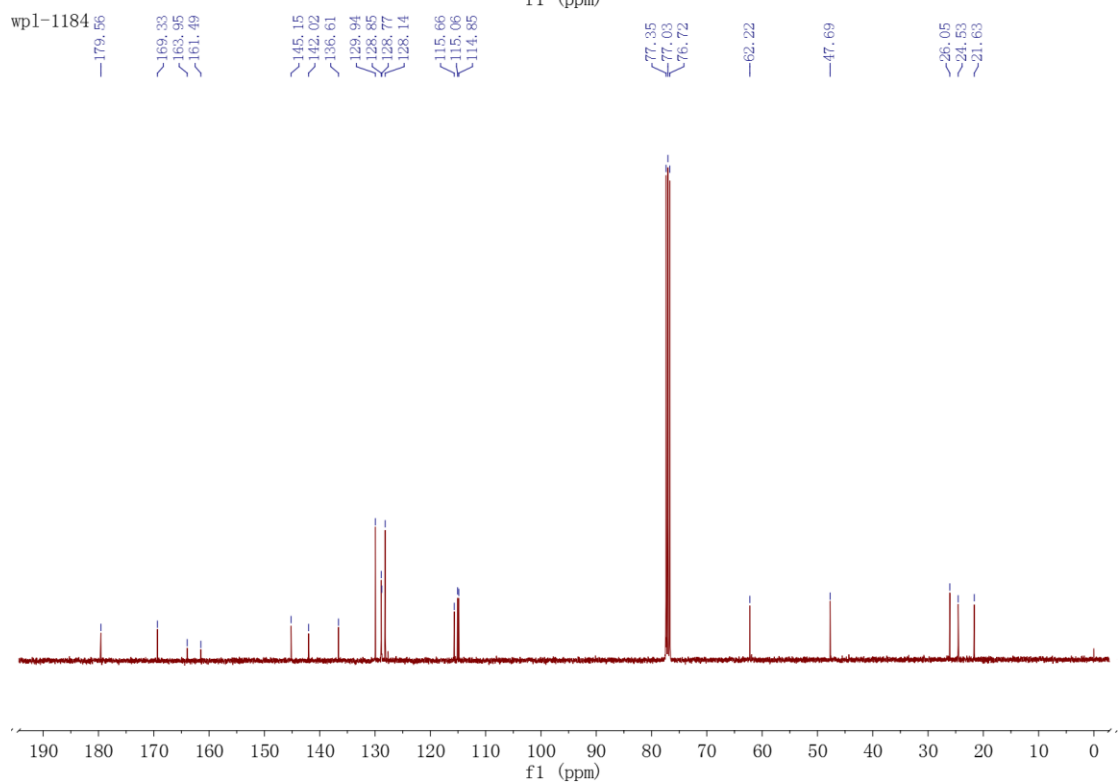

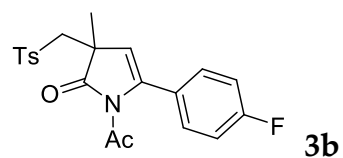

wpl-1184

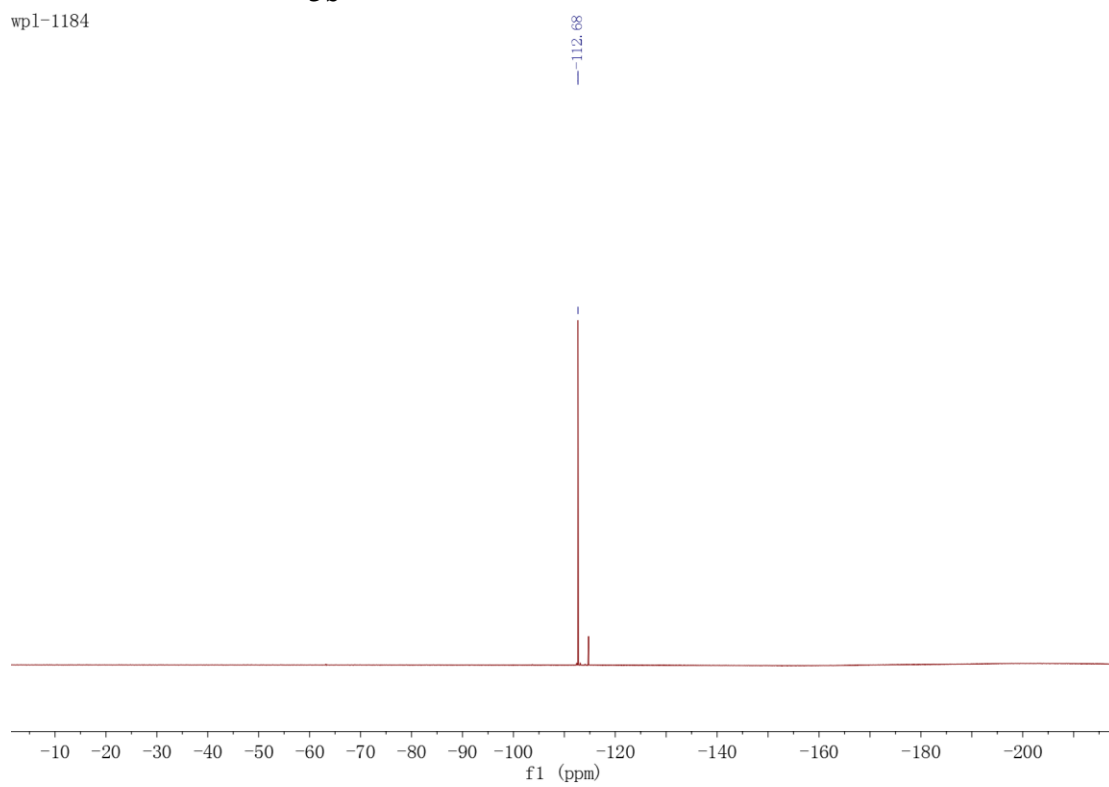

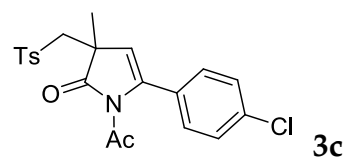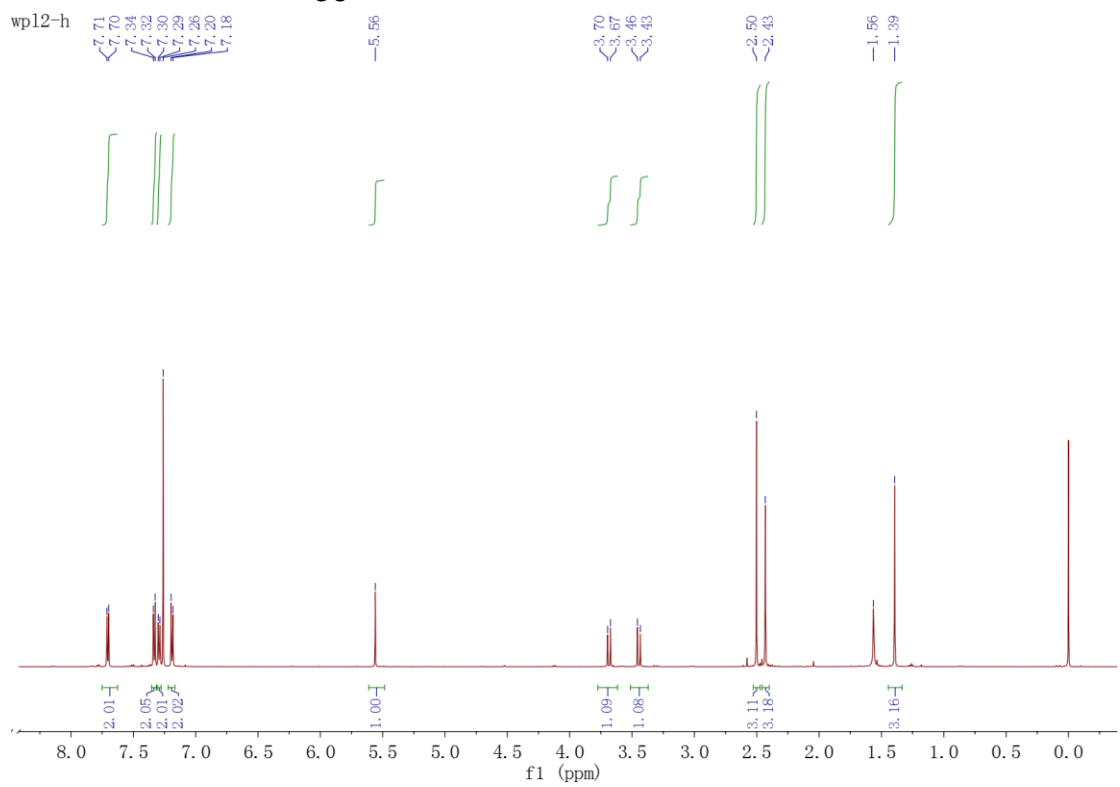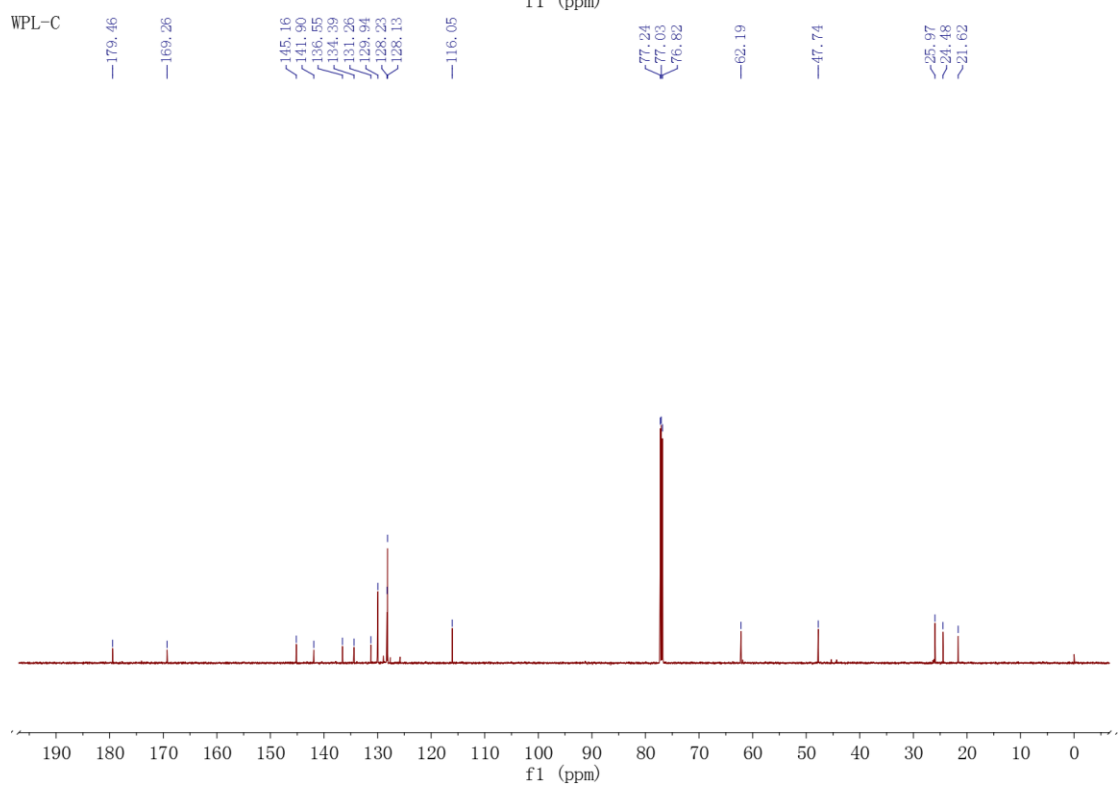

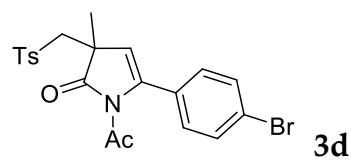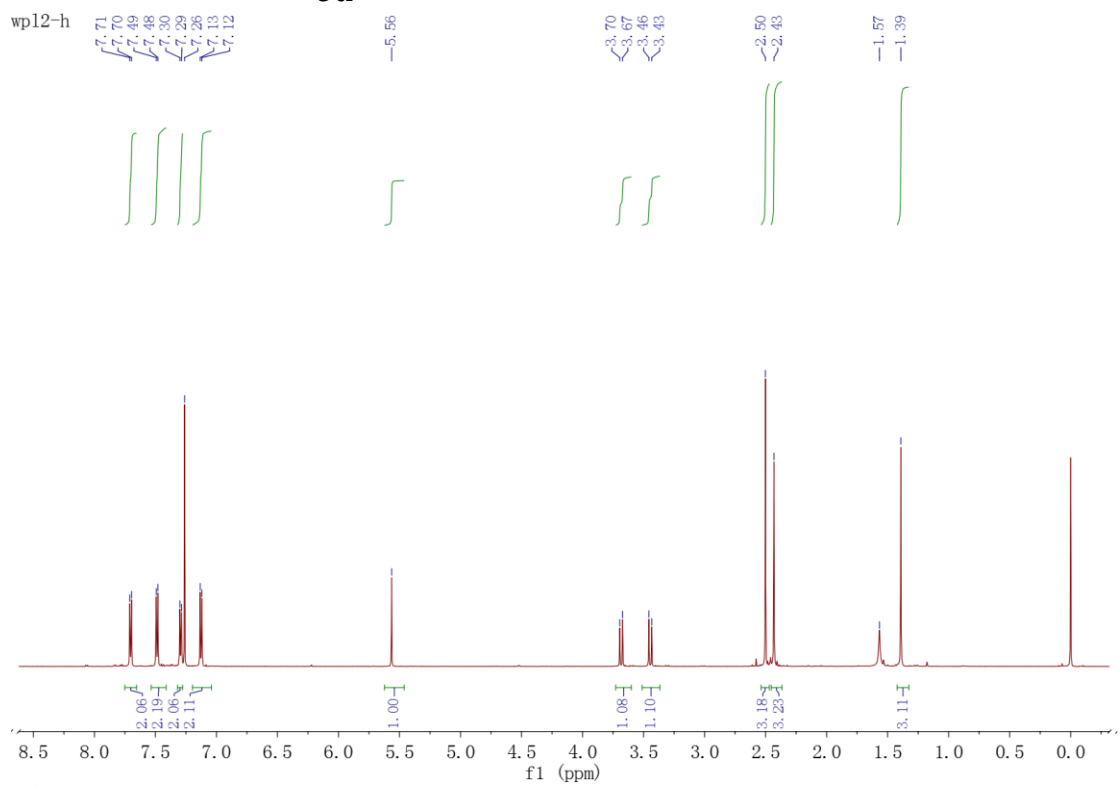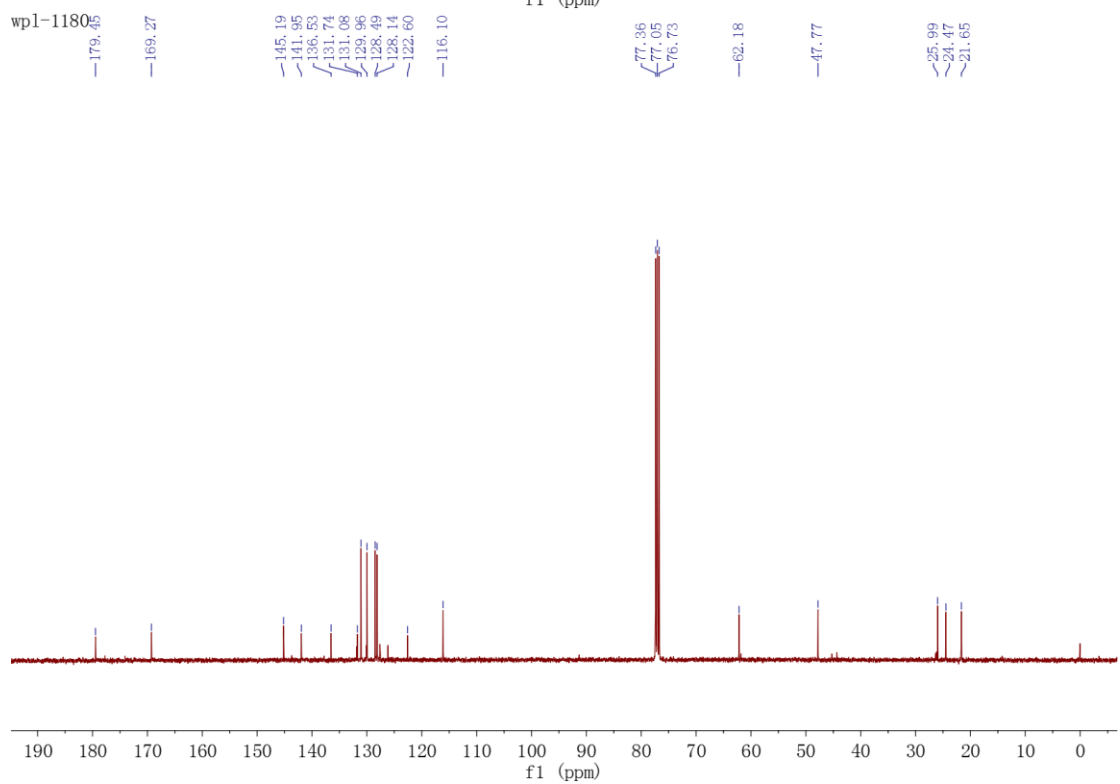



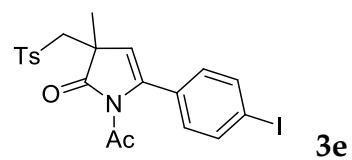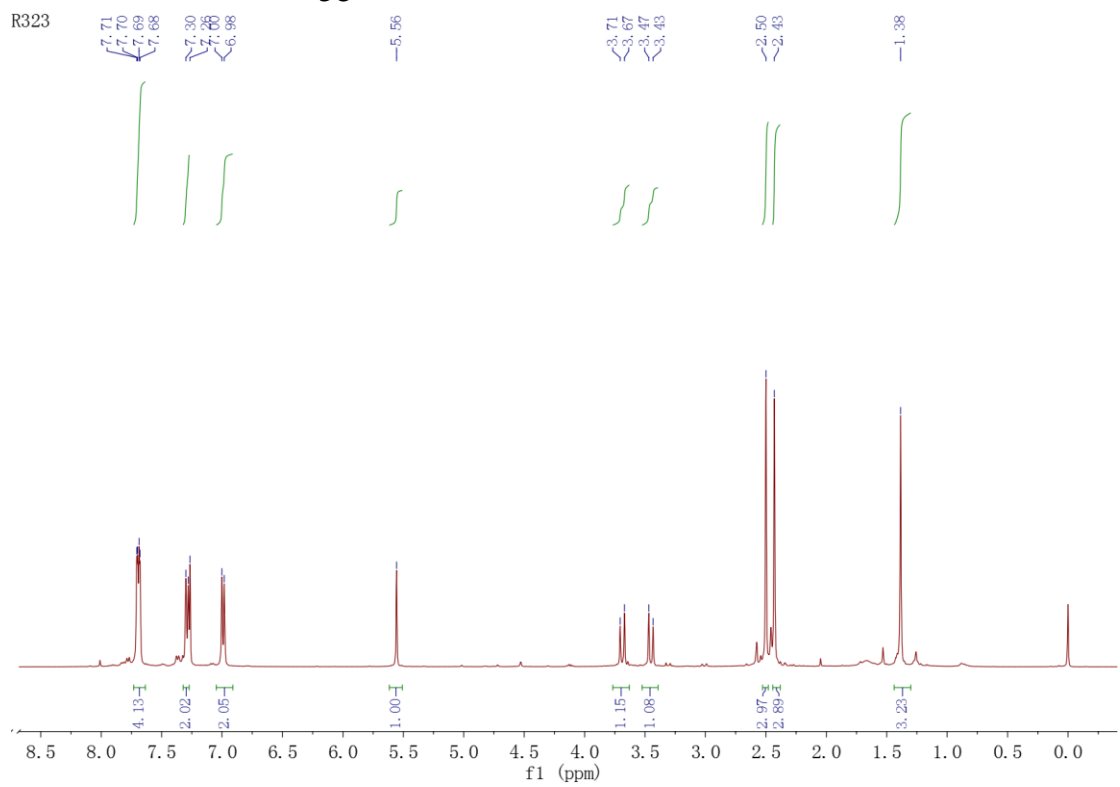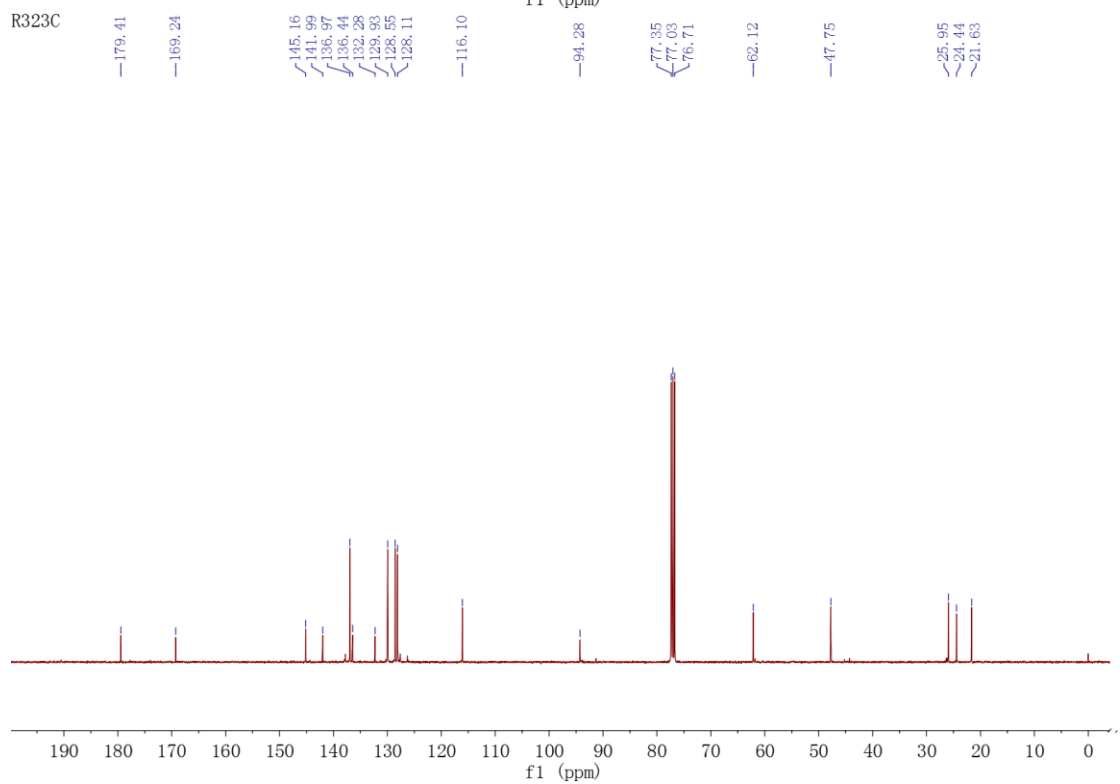

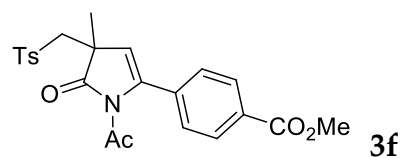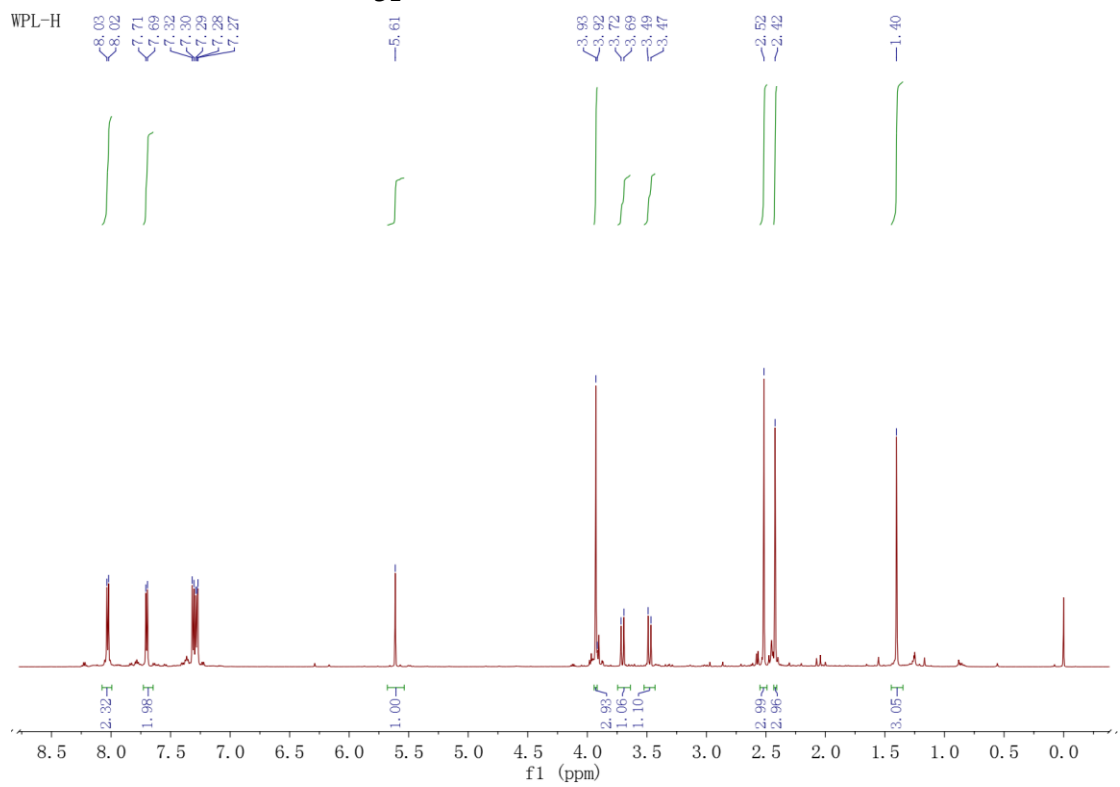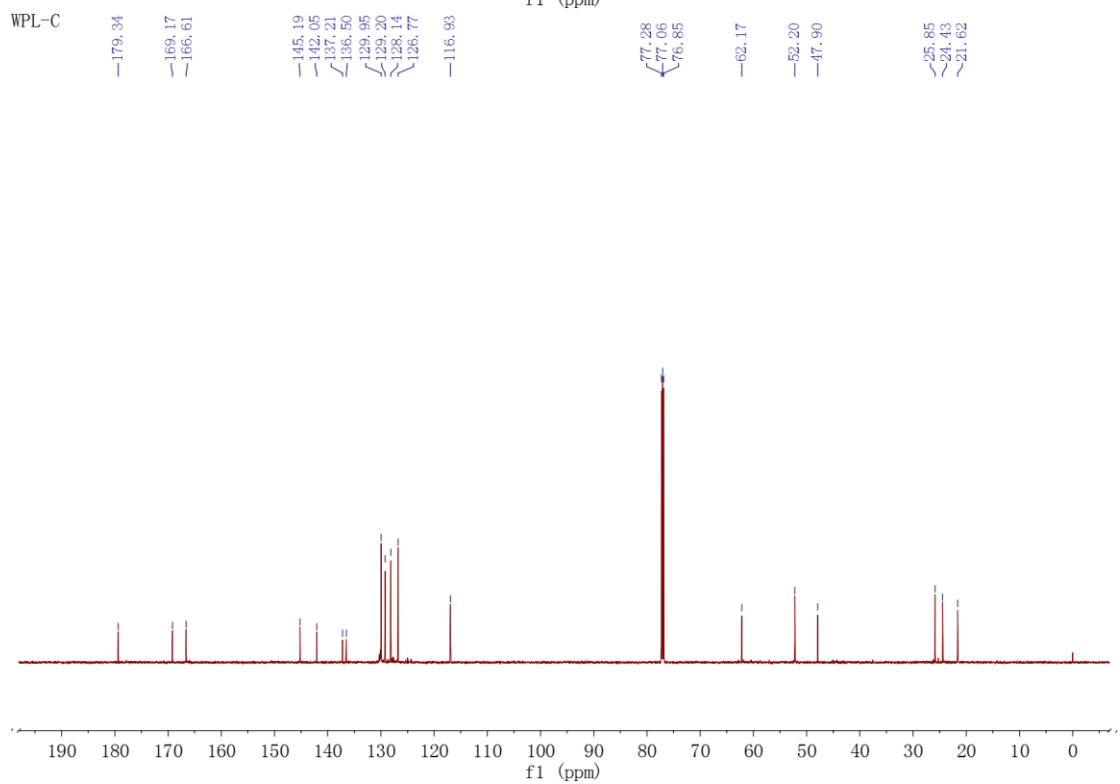

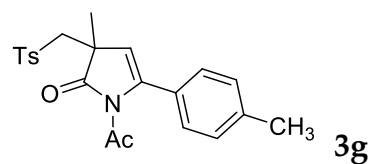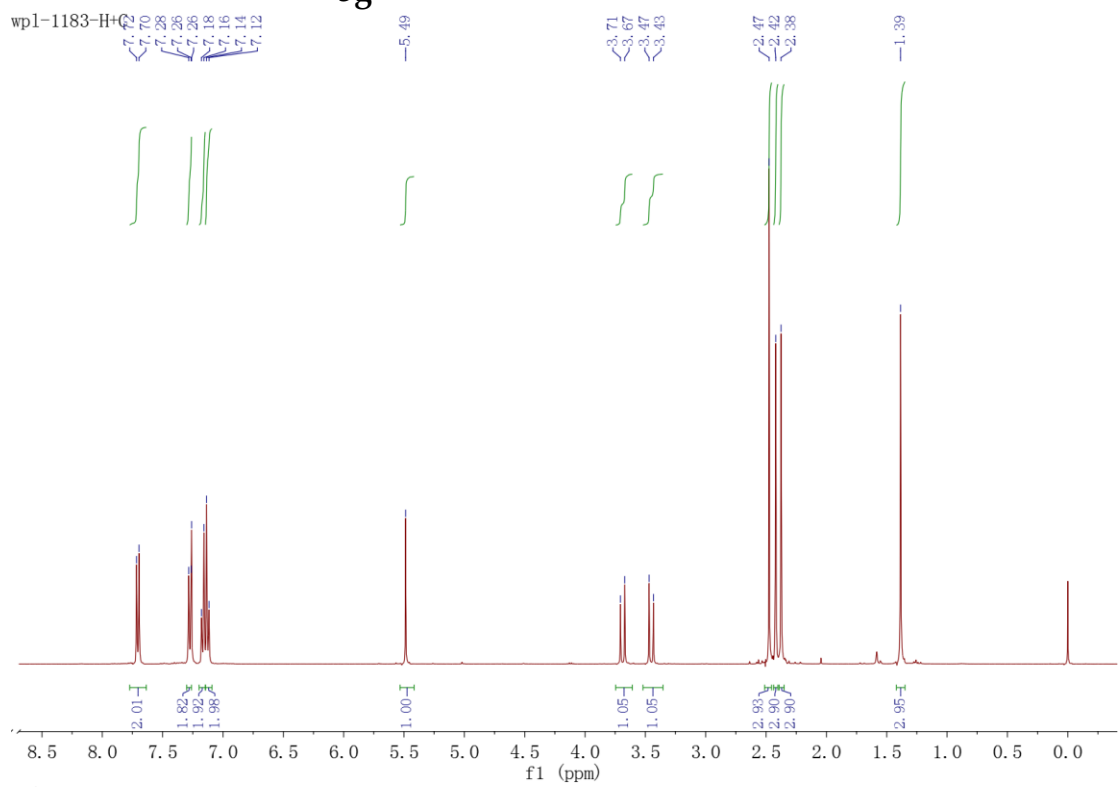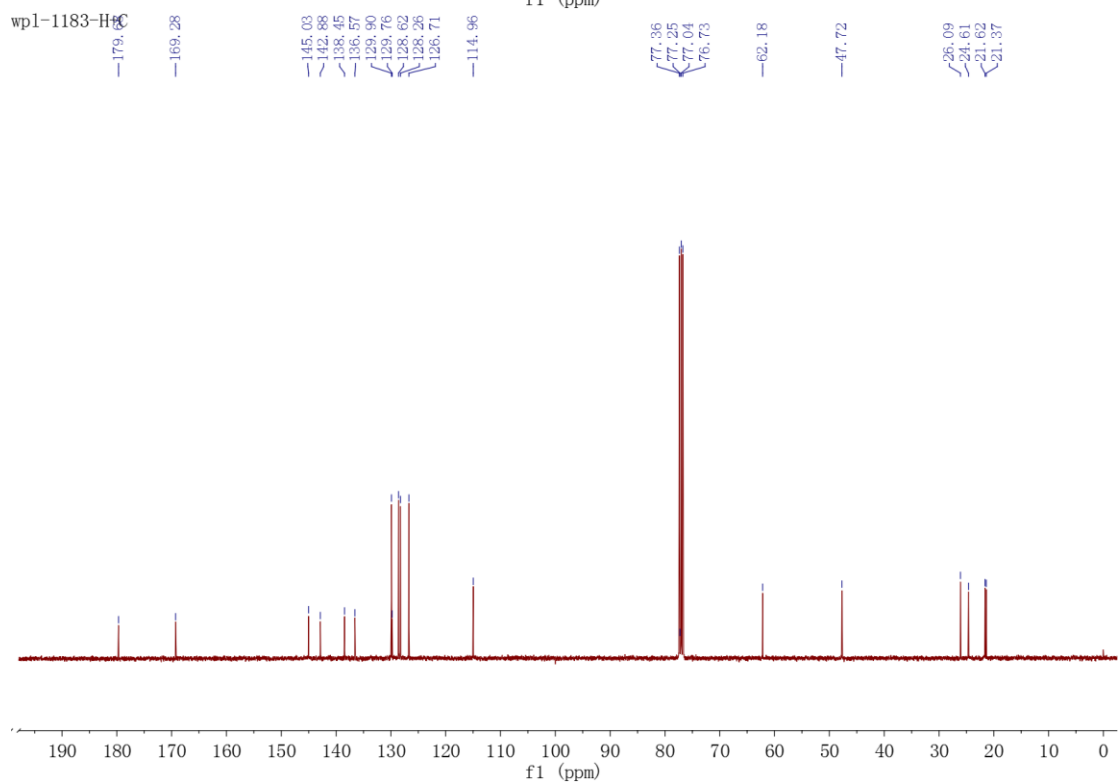

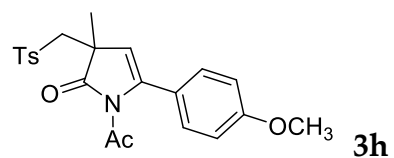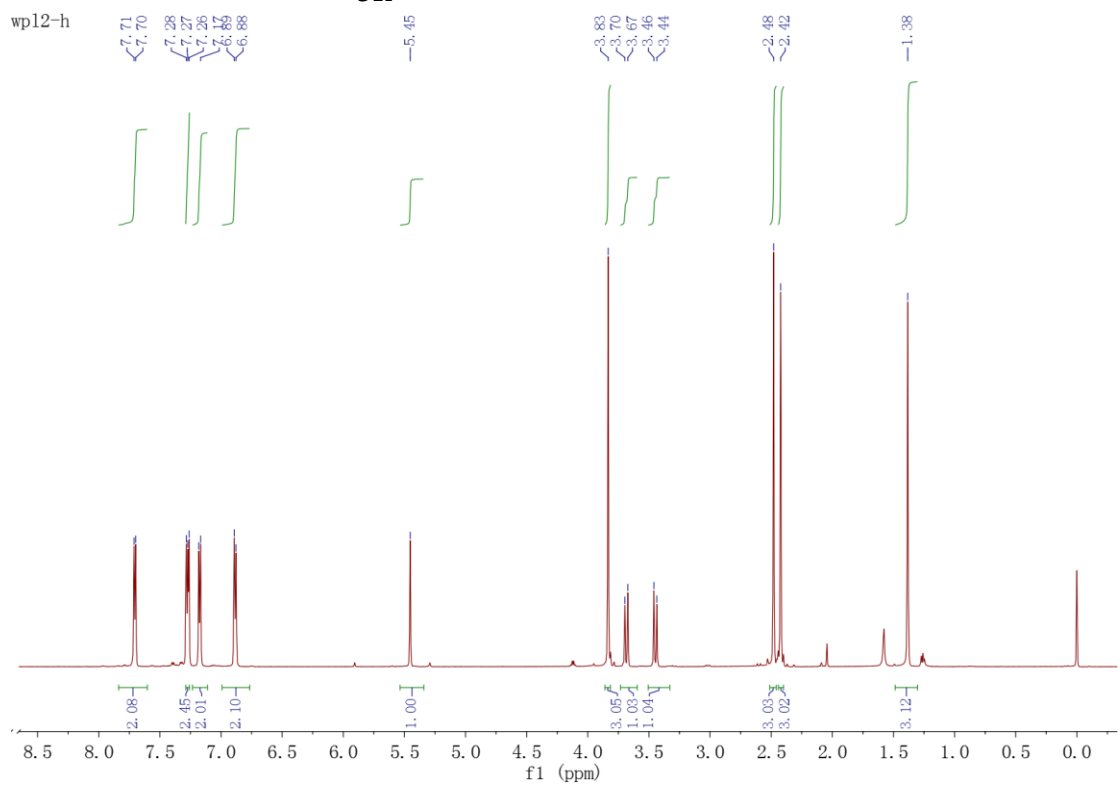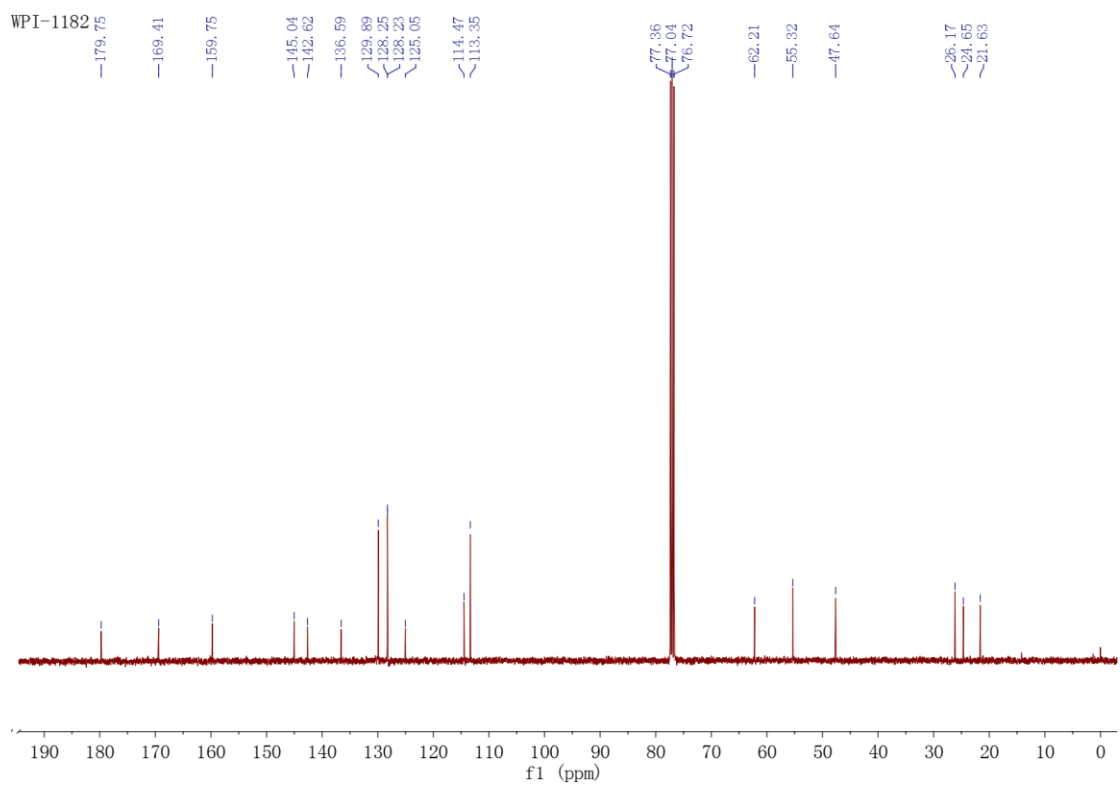

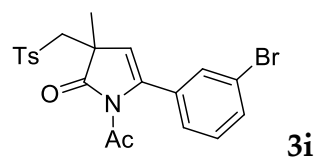

**3i**

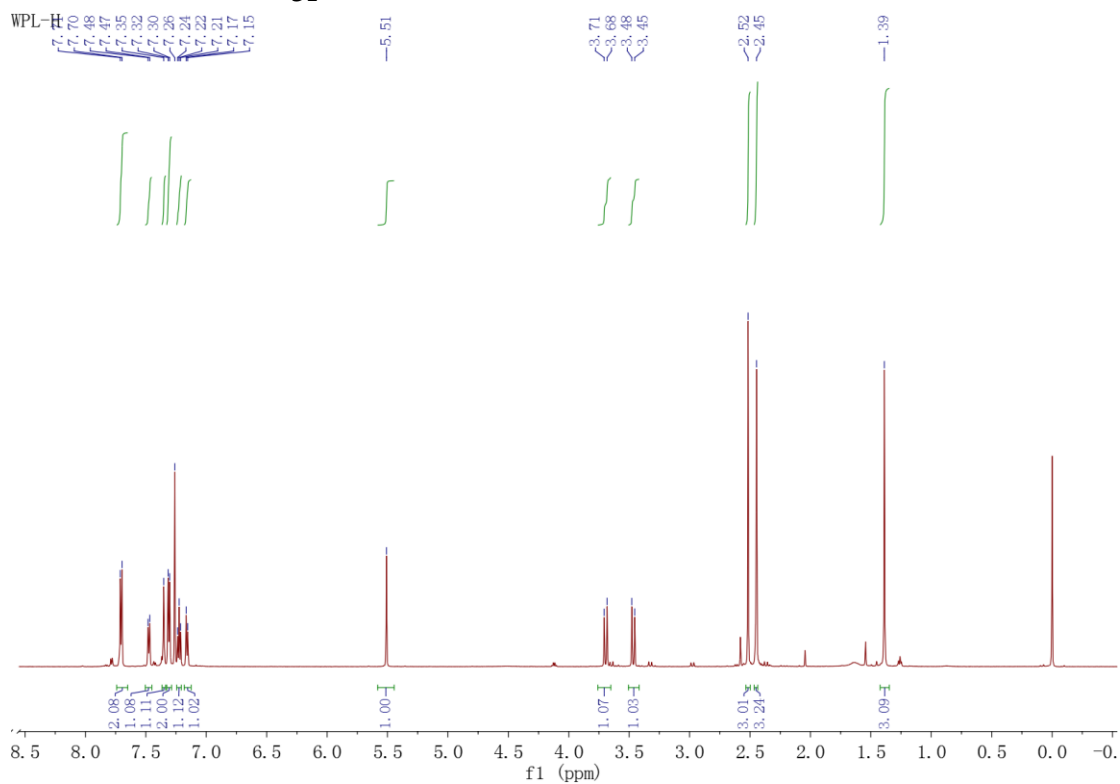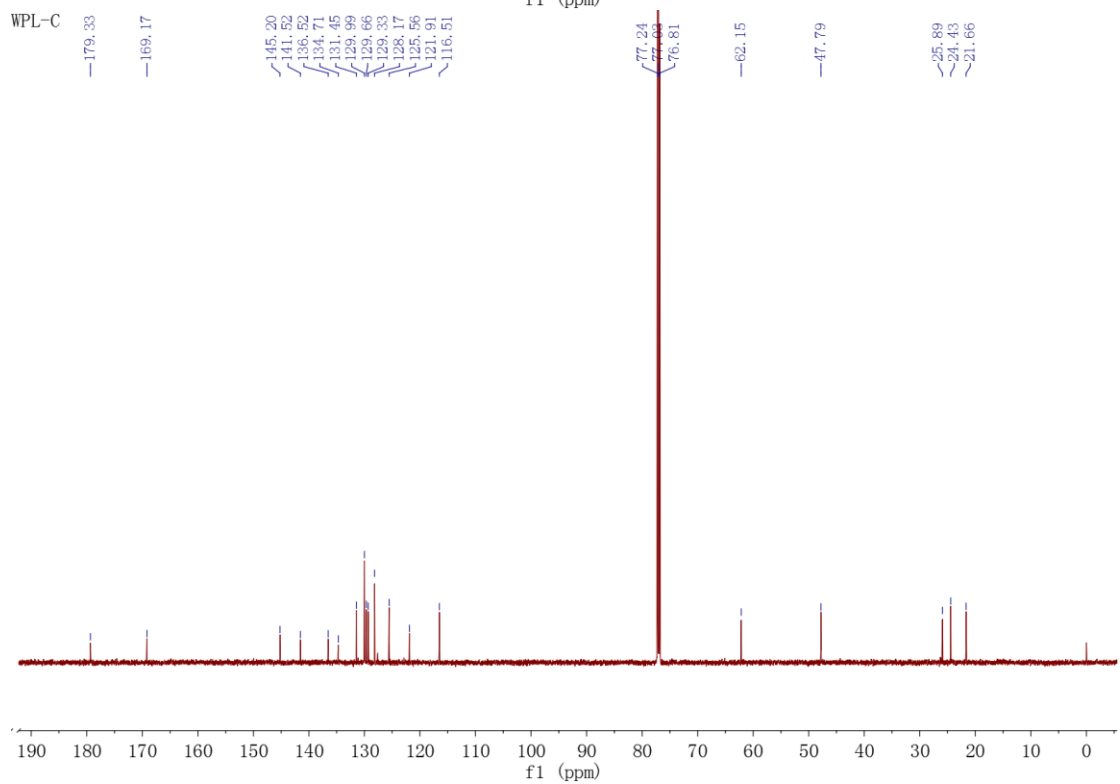

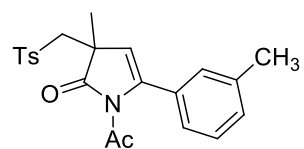

3j

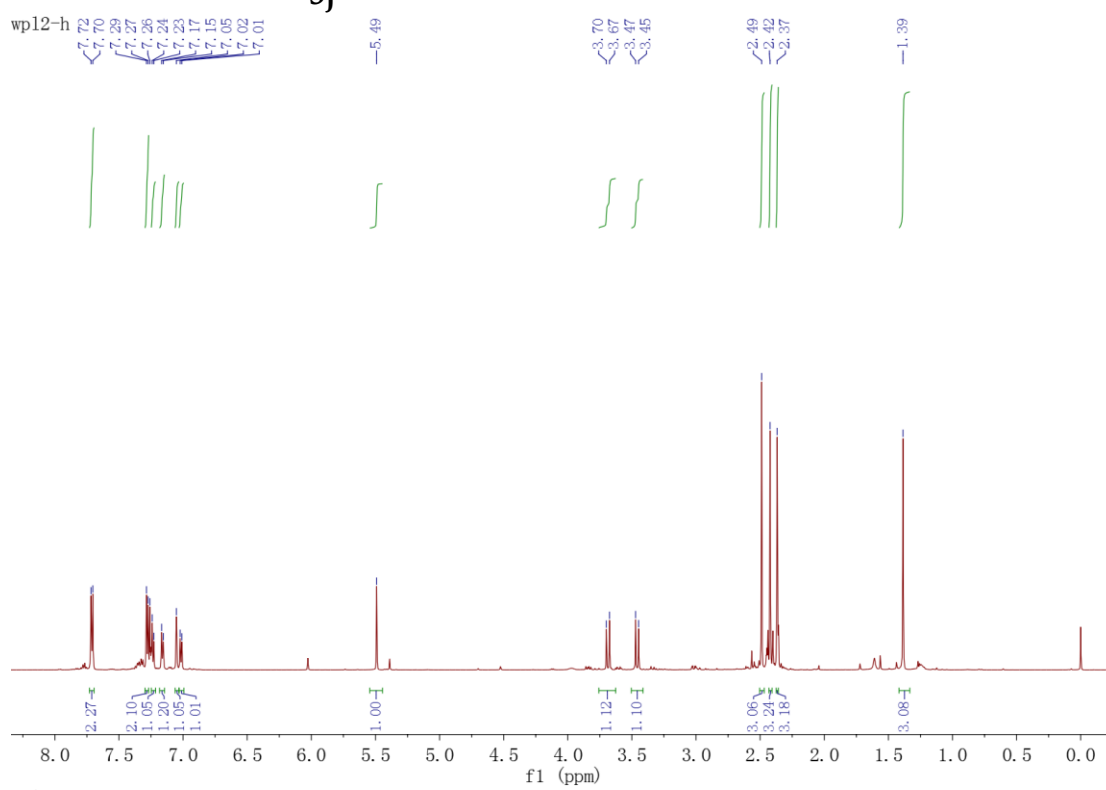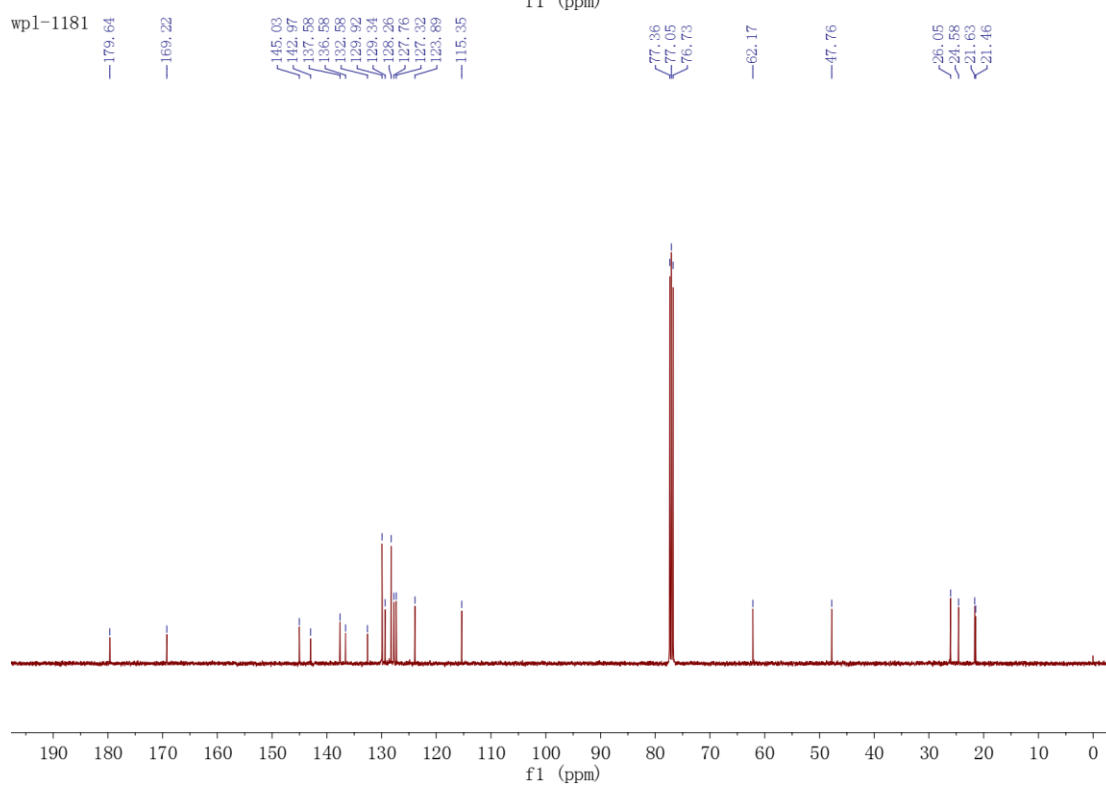

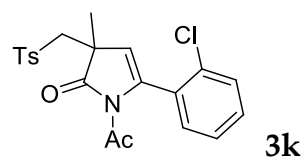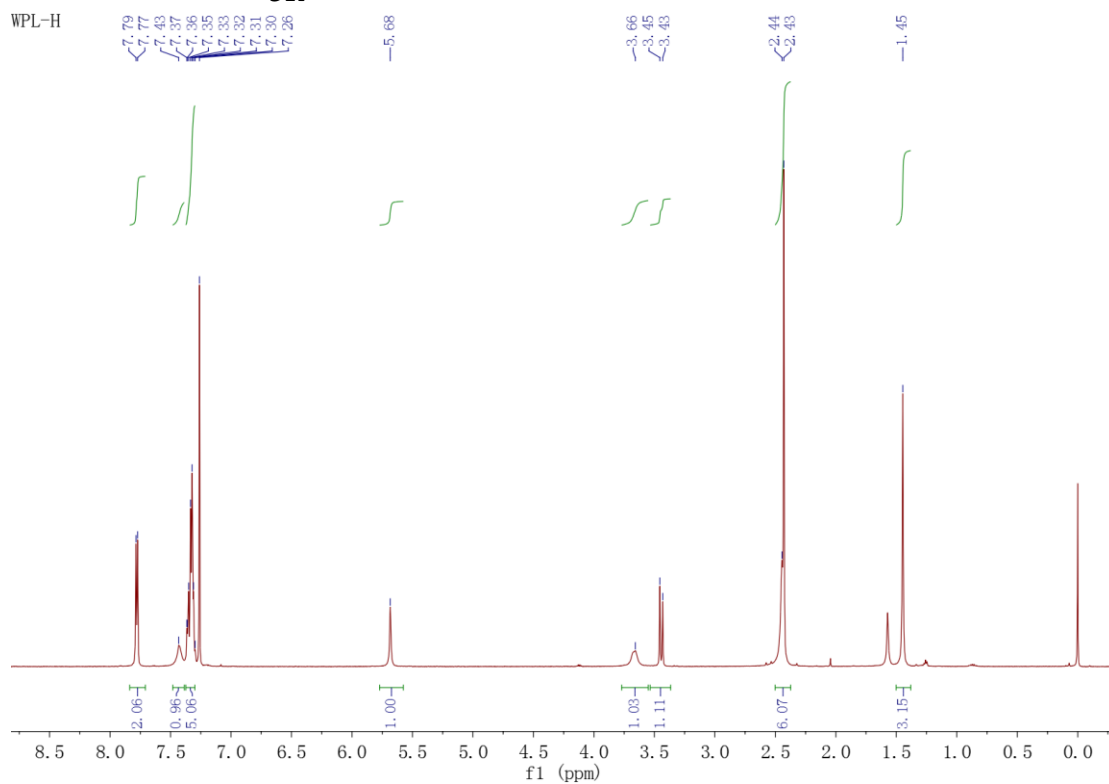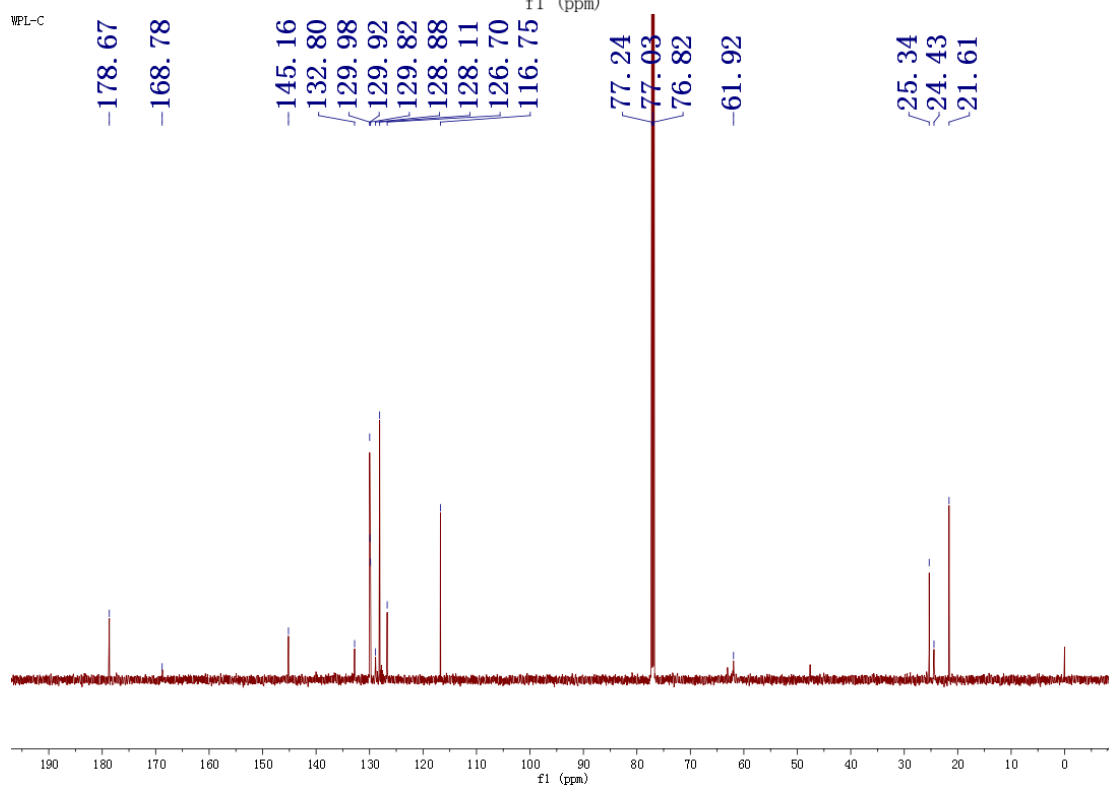

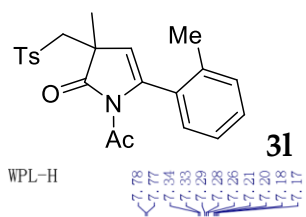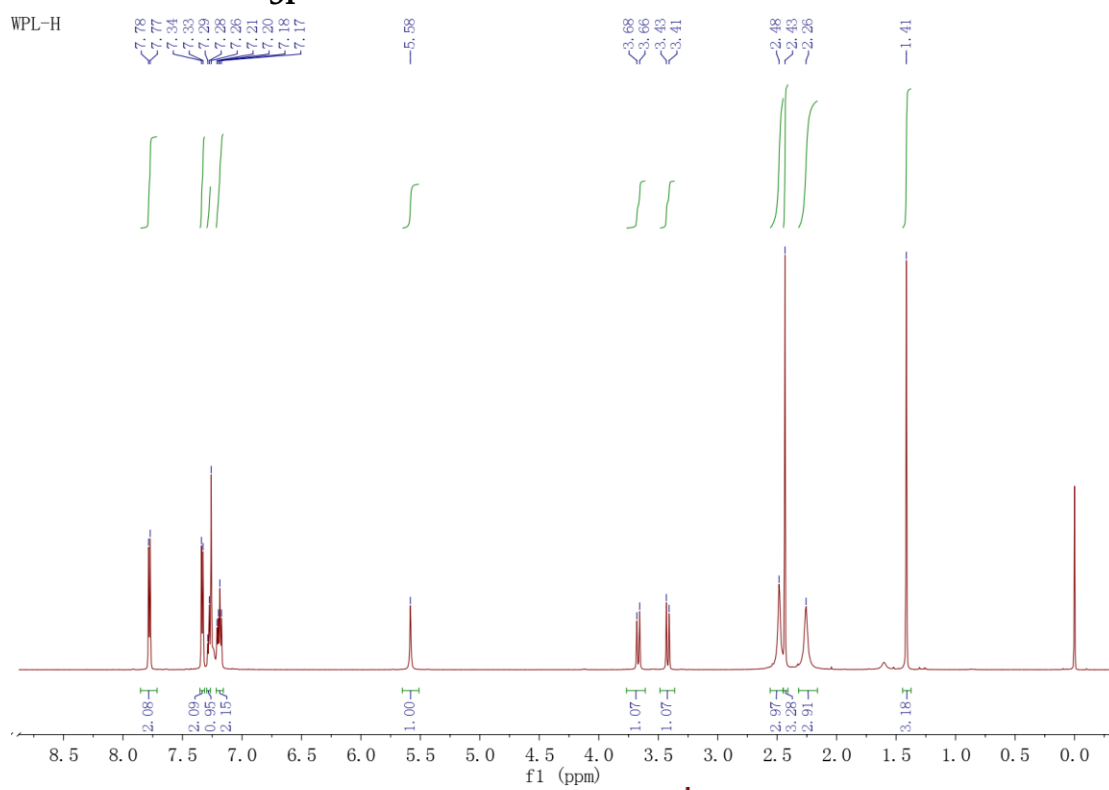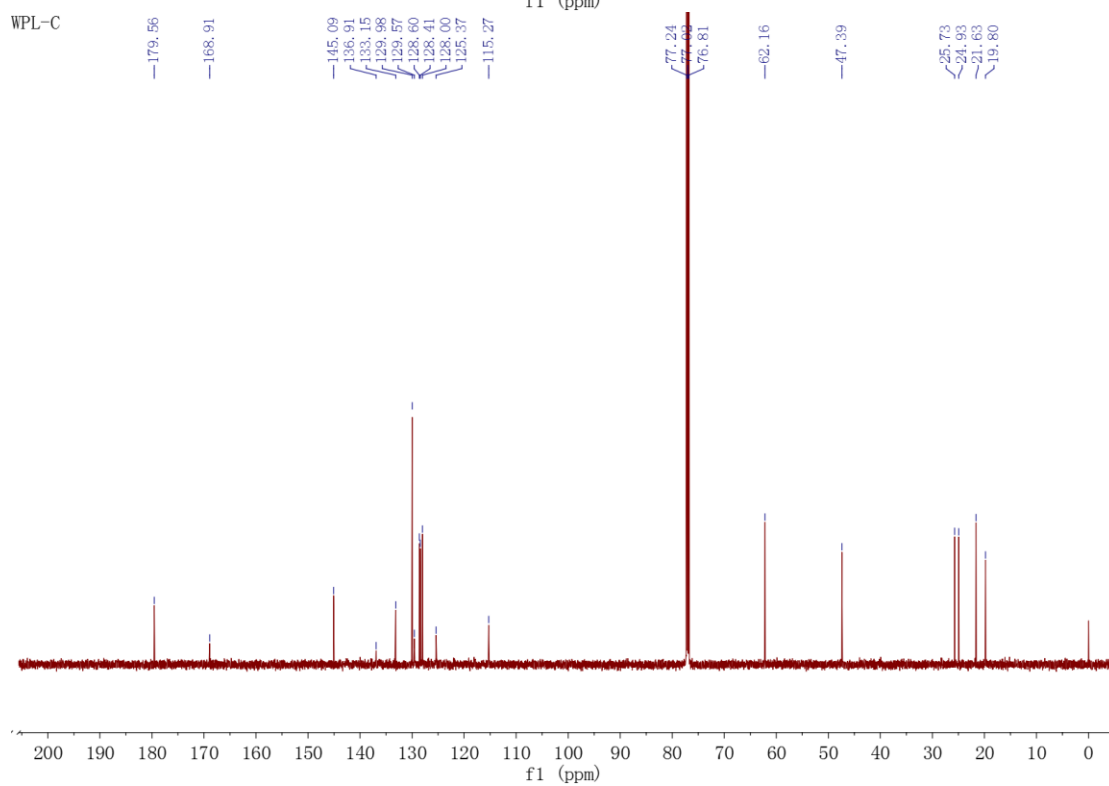



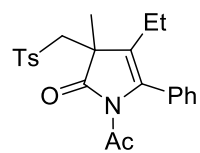

**3m**

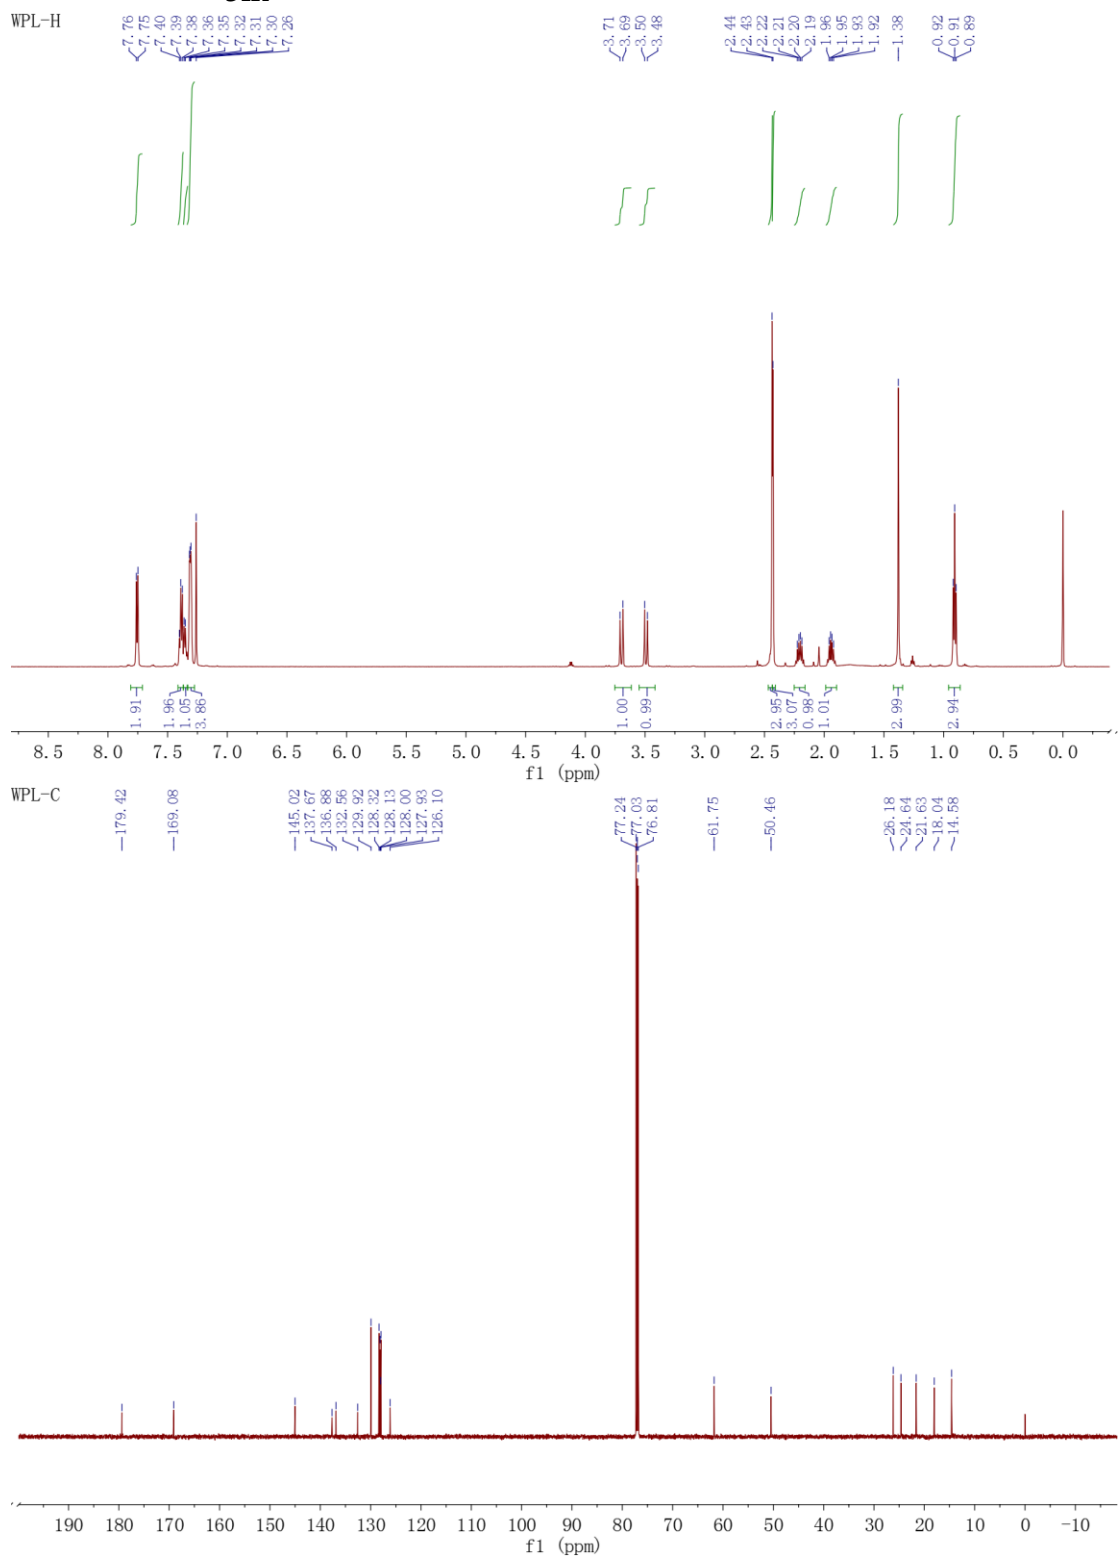

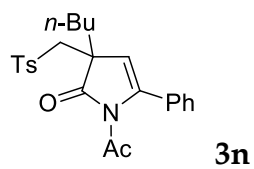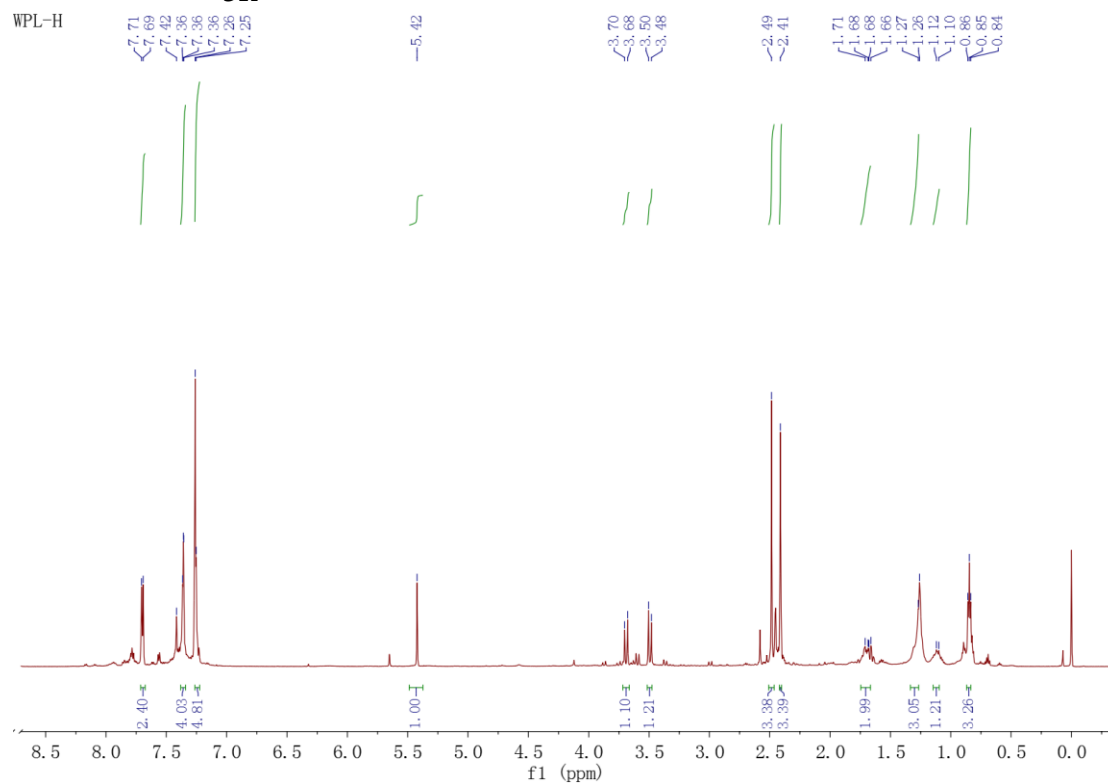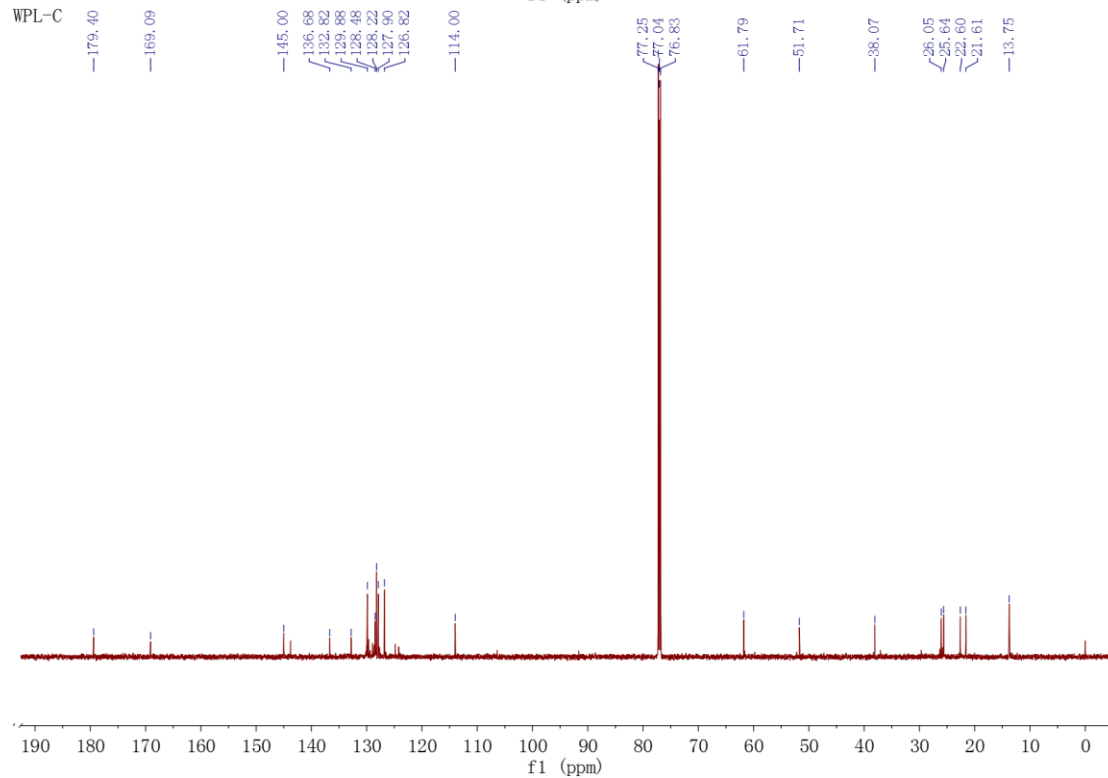

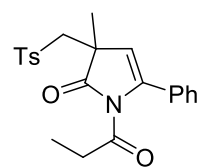

**30**

wp12-h

7.71, 7.70, 7.36, 7.35, 7.27, 7.26, 7.24, 7.23, 7.22, 5.51, 3.71, 3.68, 3.47, 3.44, 2.91, 2.89, 2.88, 2.41, 1.39, 1.15, 1.14, 1.12

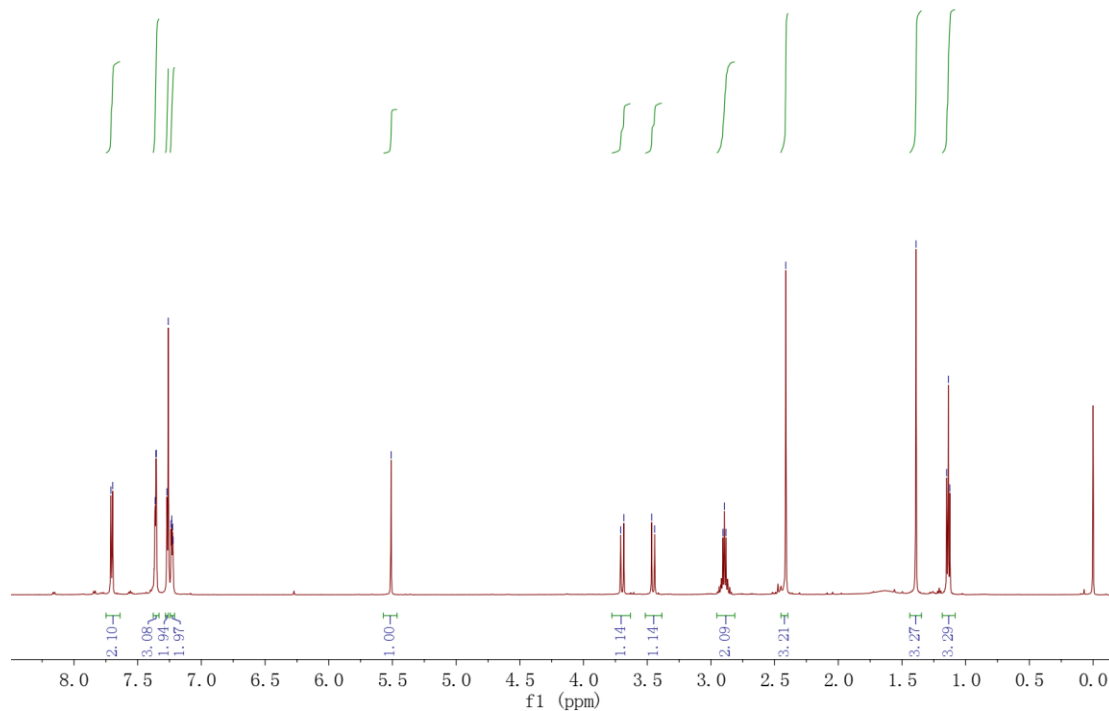

wp12-c

179.43, 173.23, 145.03, 143.01, 136.60, 132.85, 129.87, 128.48, 128.22, 127.63, 126.70, 115.49, 77.24, 77.03, 76.82, 62.16, 47.83, 31.58, 24.63, 21.62, 8.33

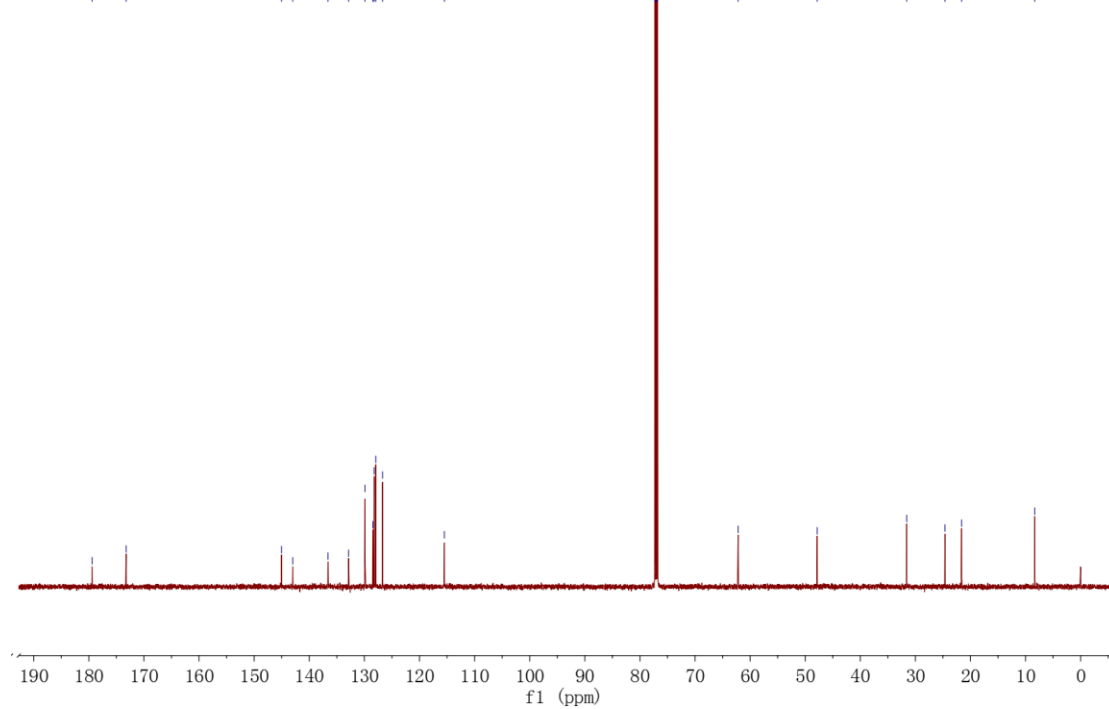

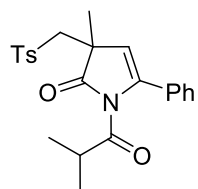

**3p**

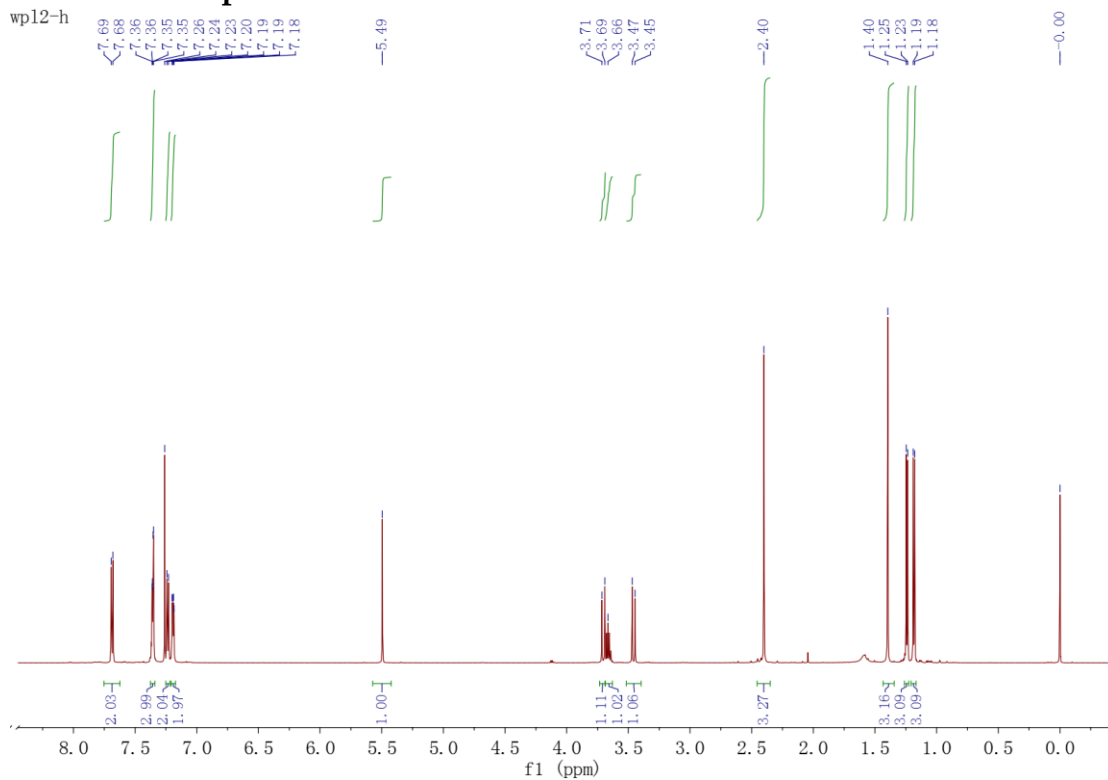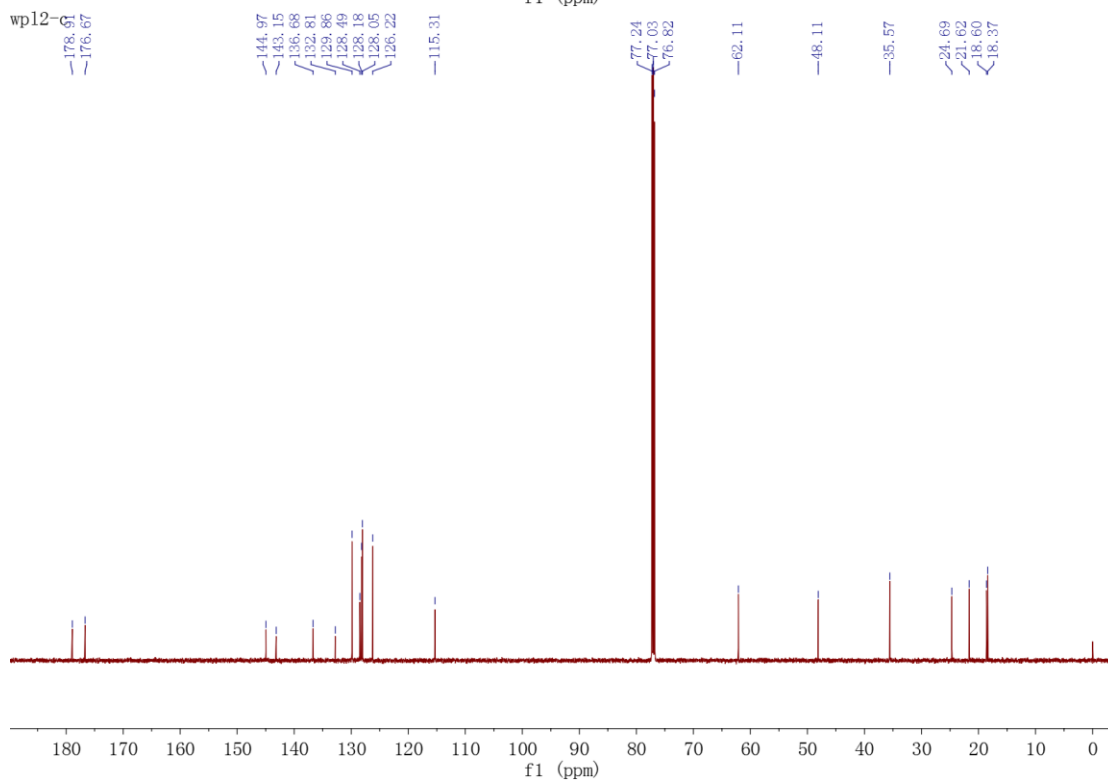

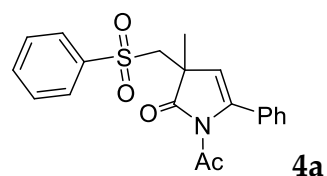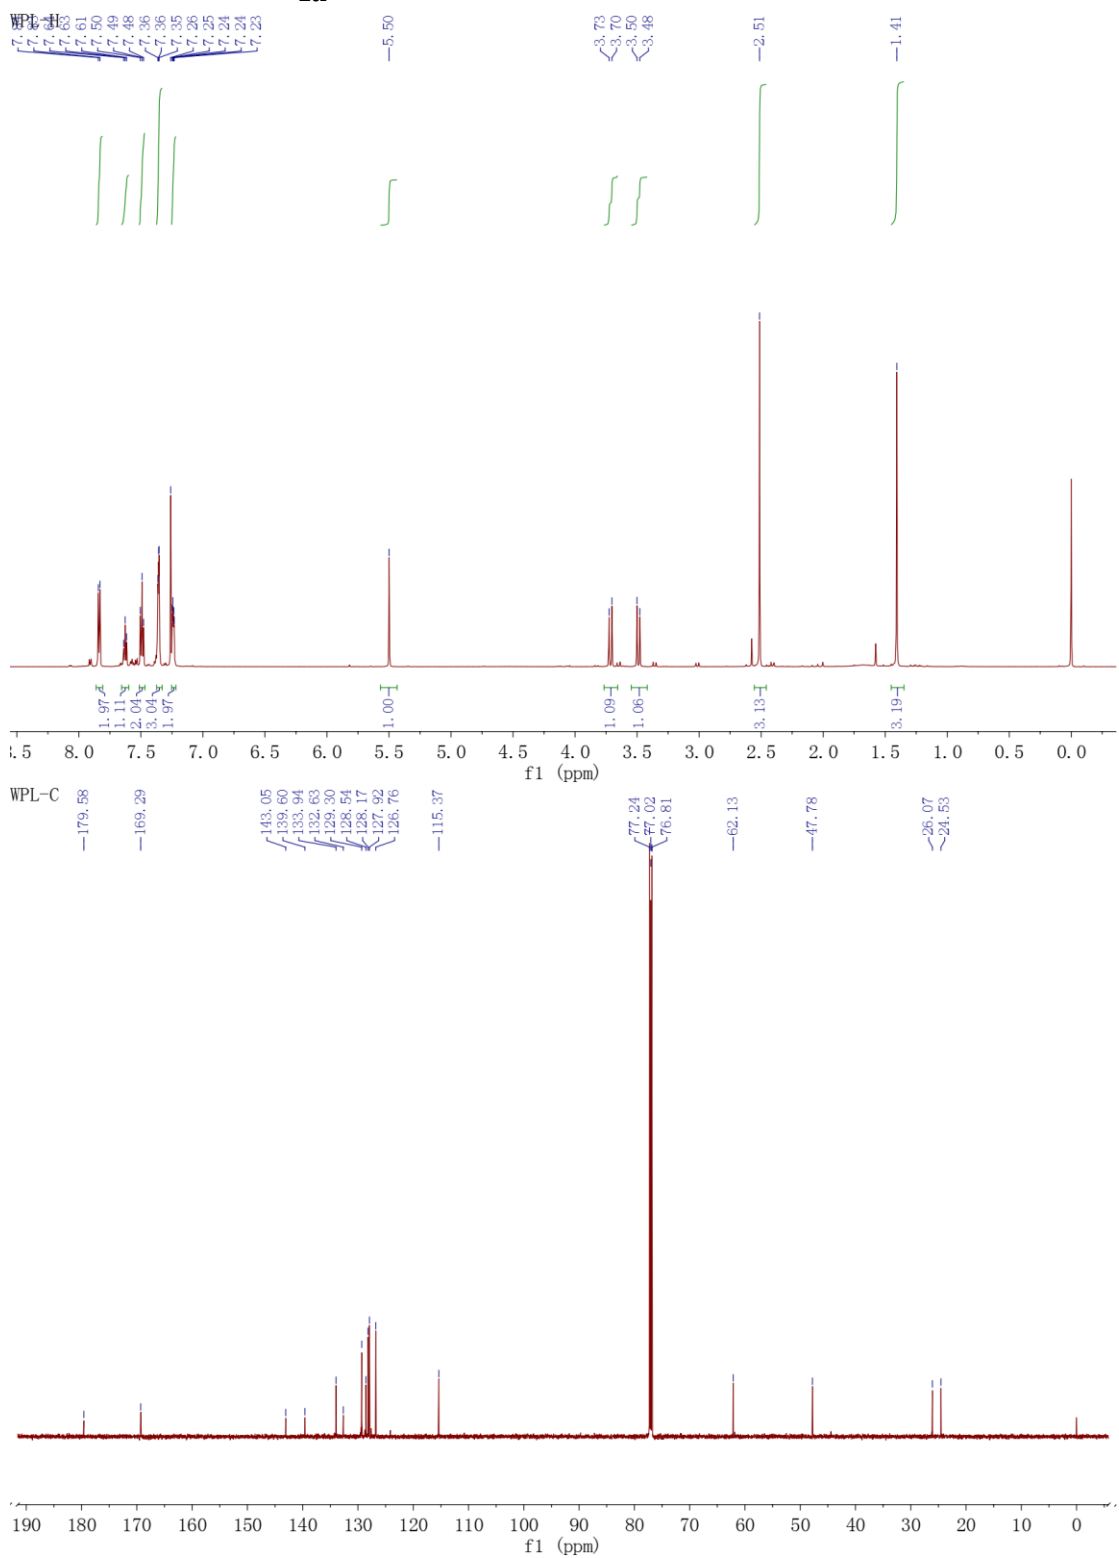

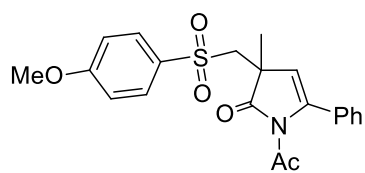

**4b**

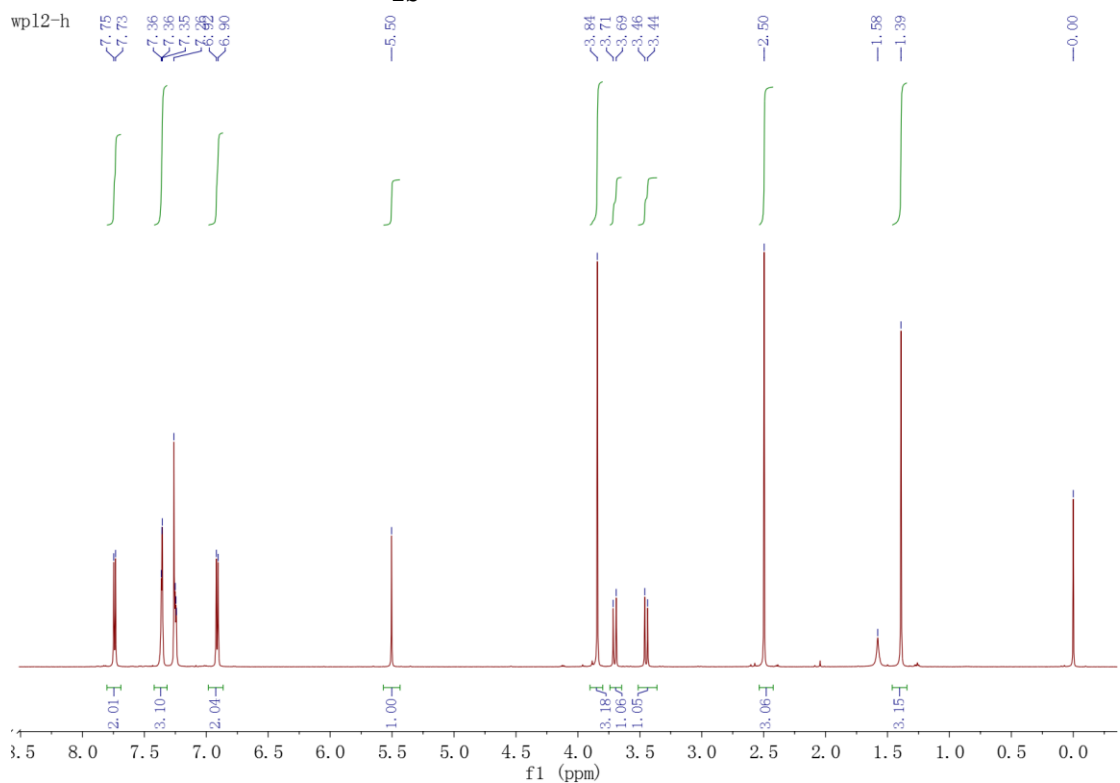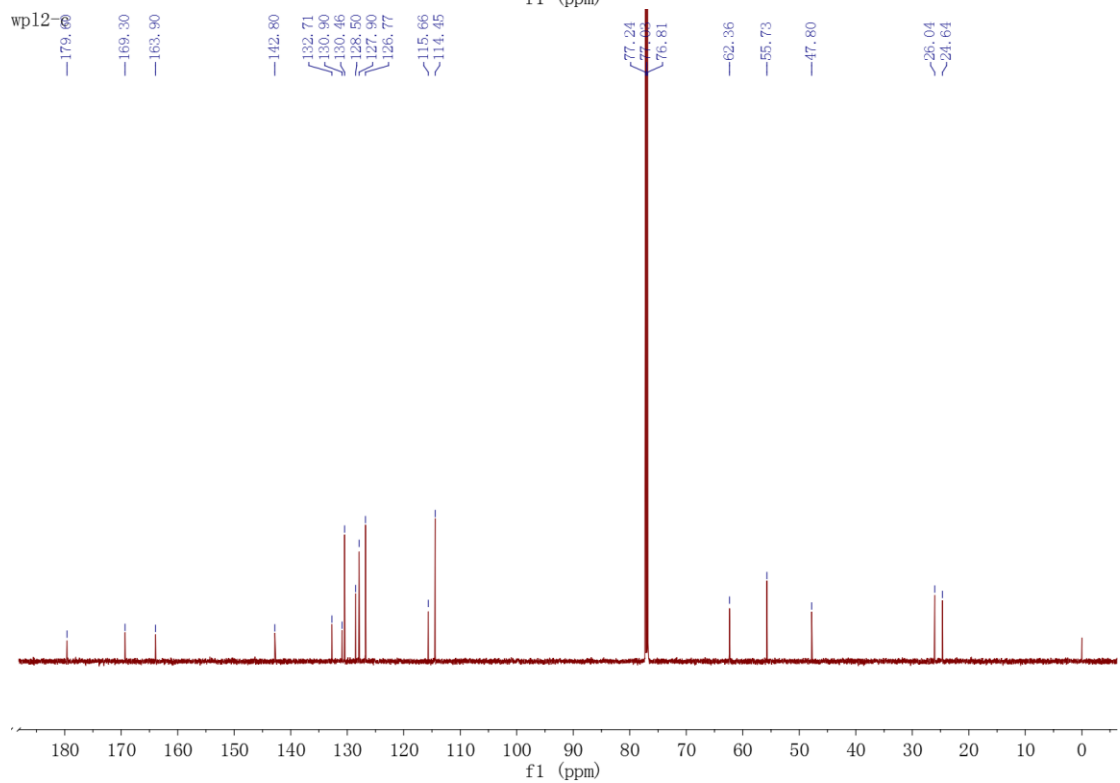

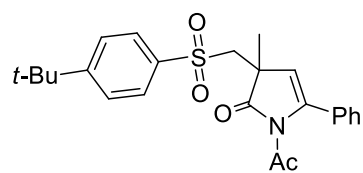

**4c**

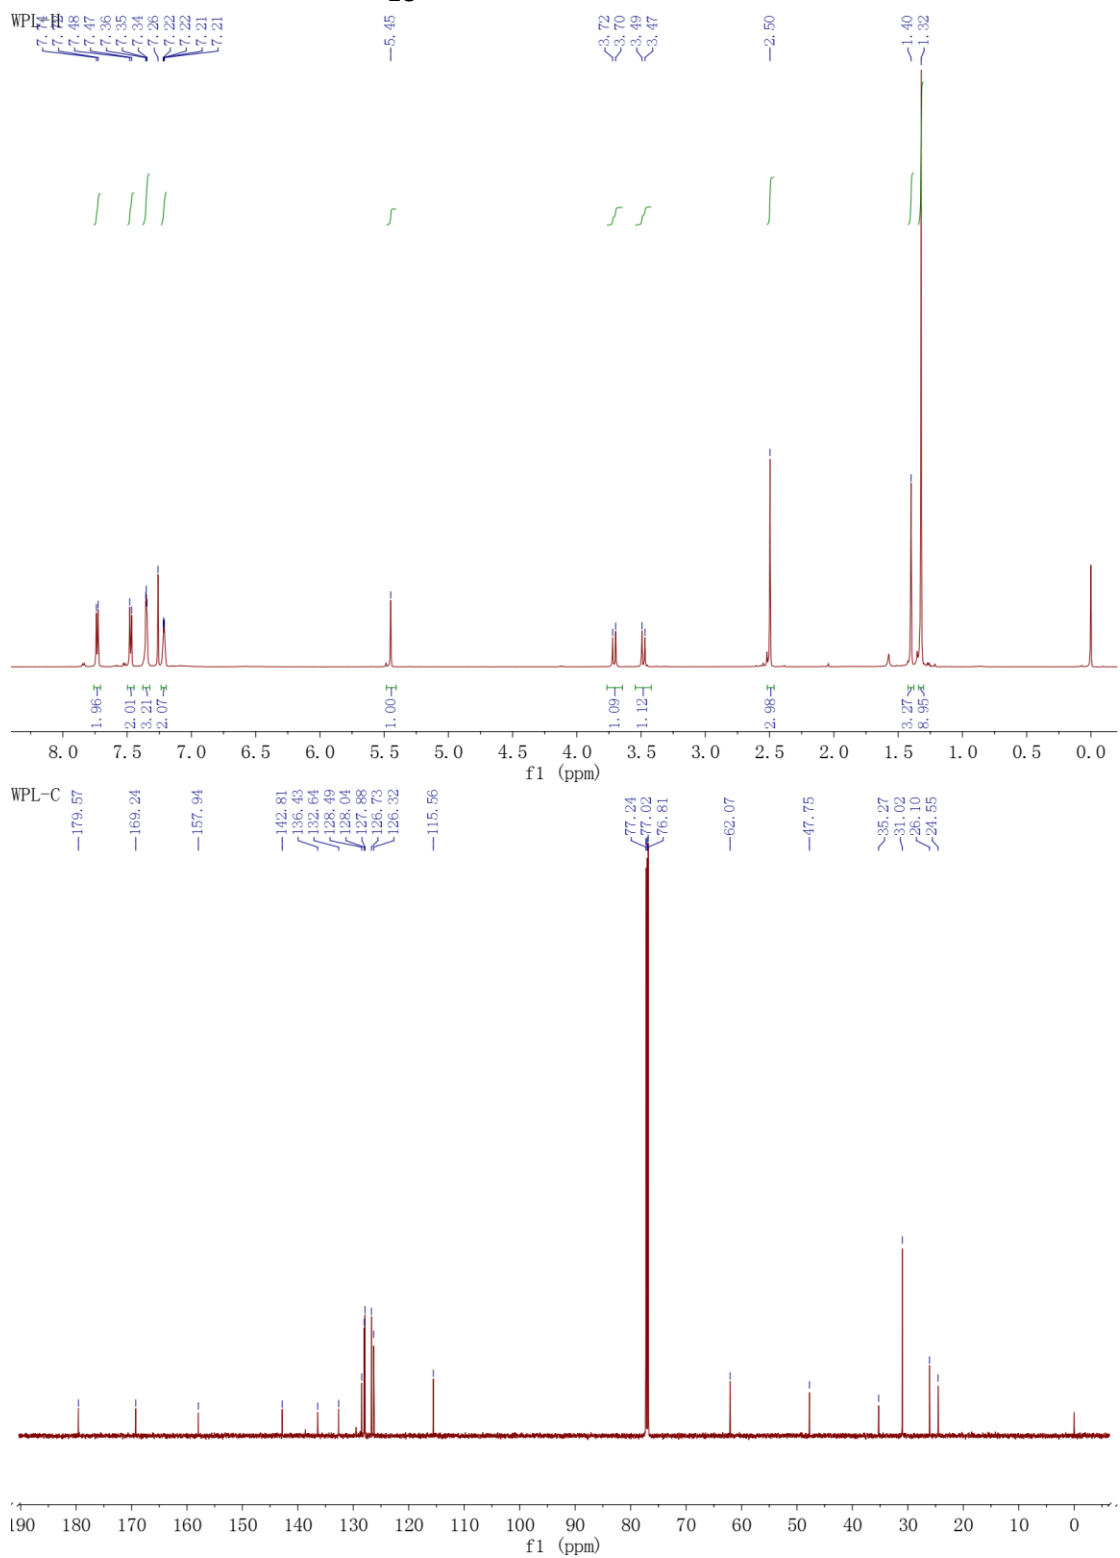

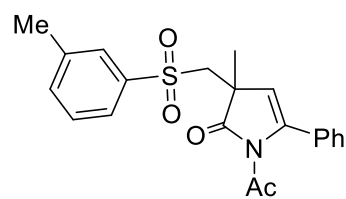

**4d**

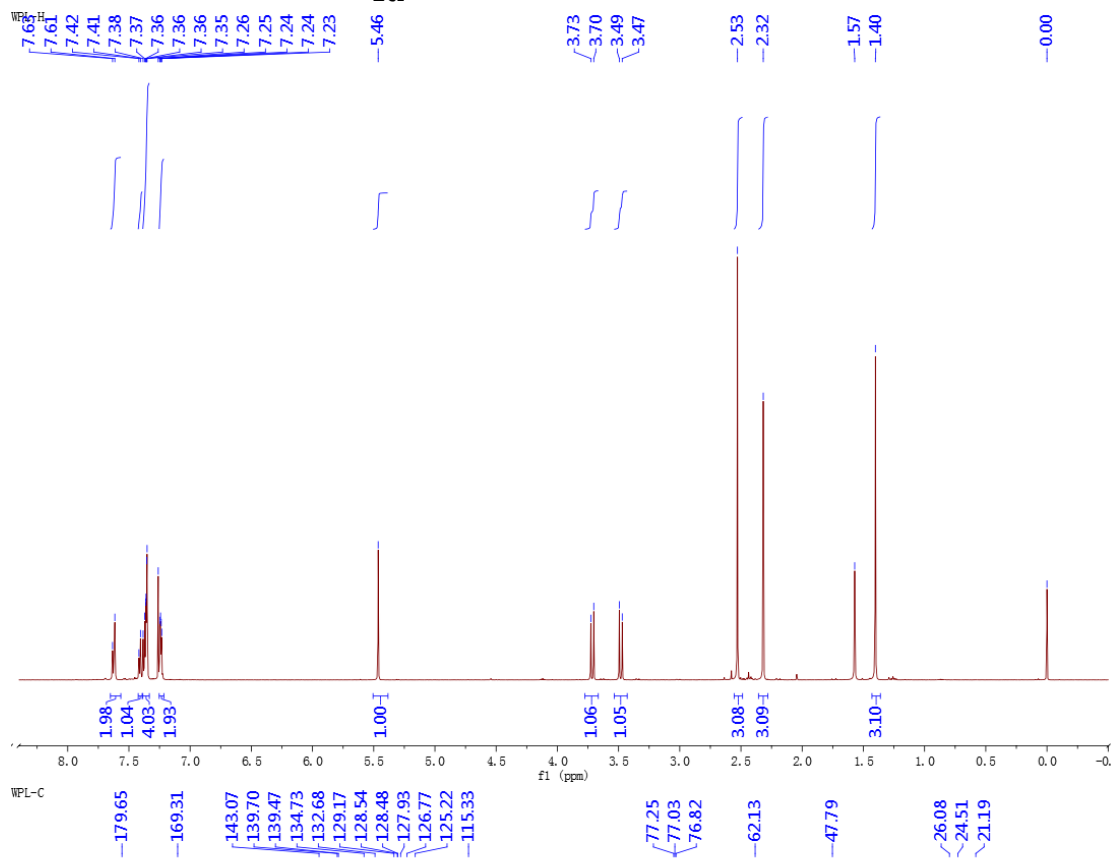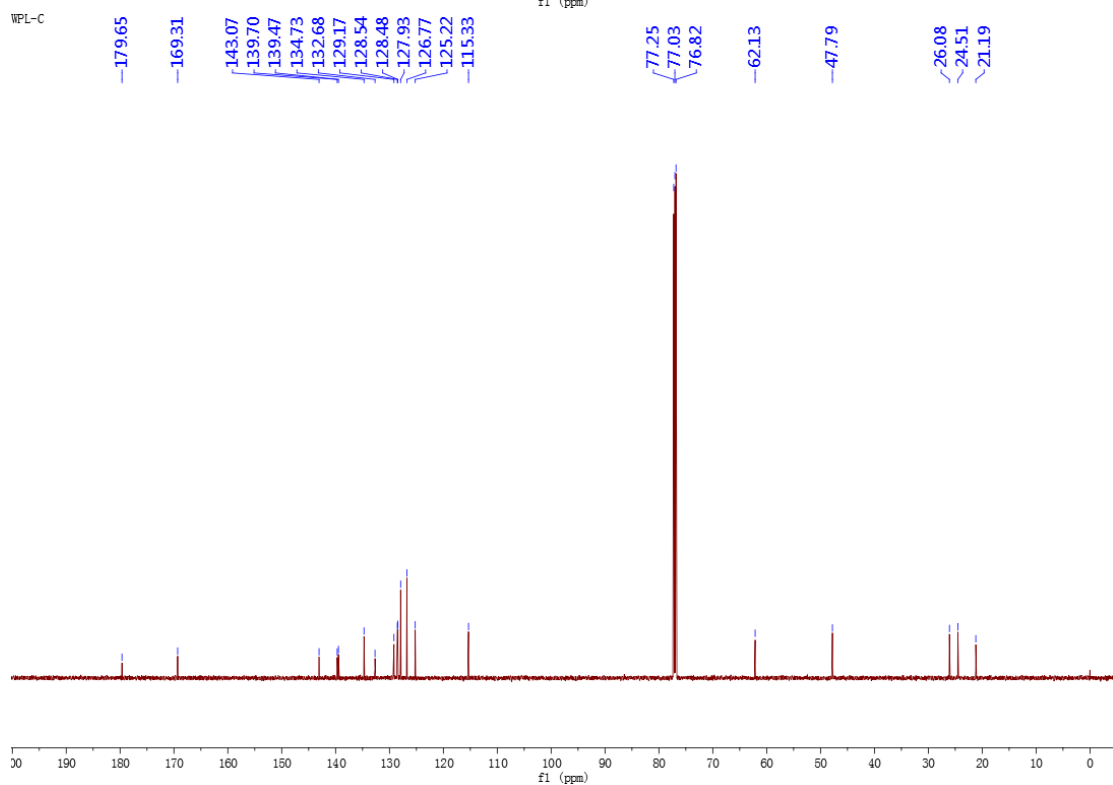



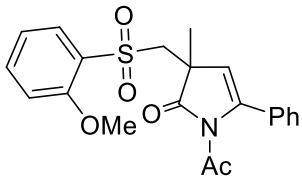

**4e**

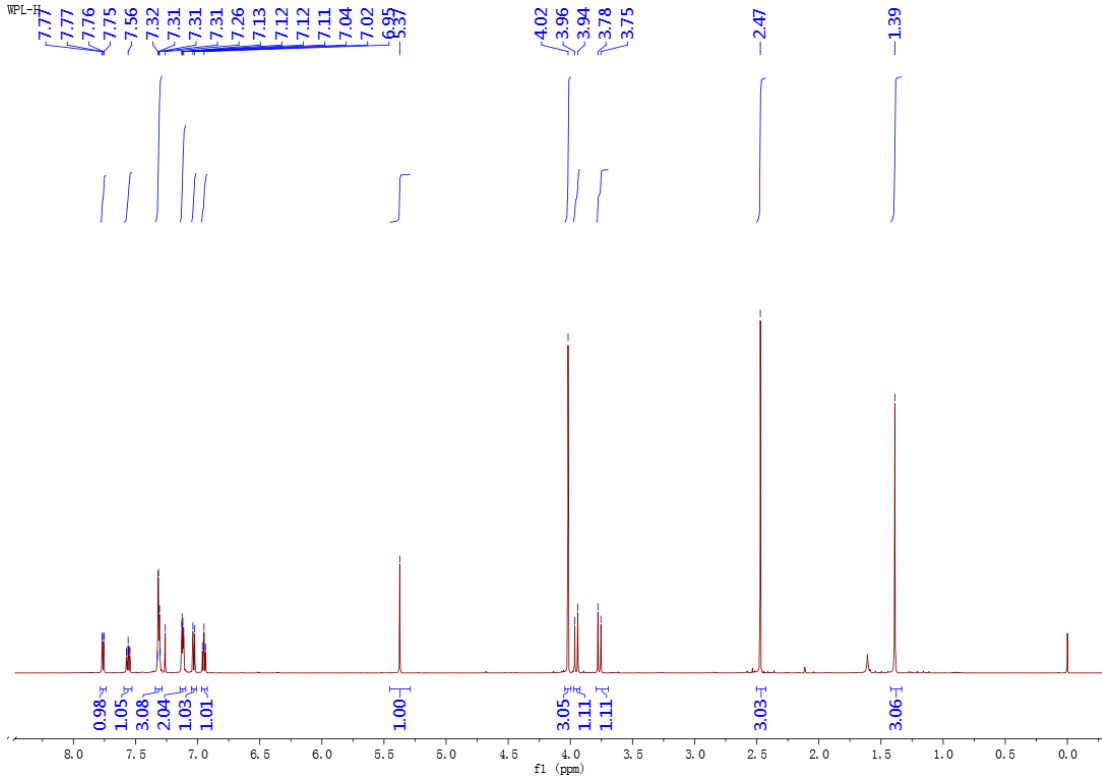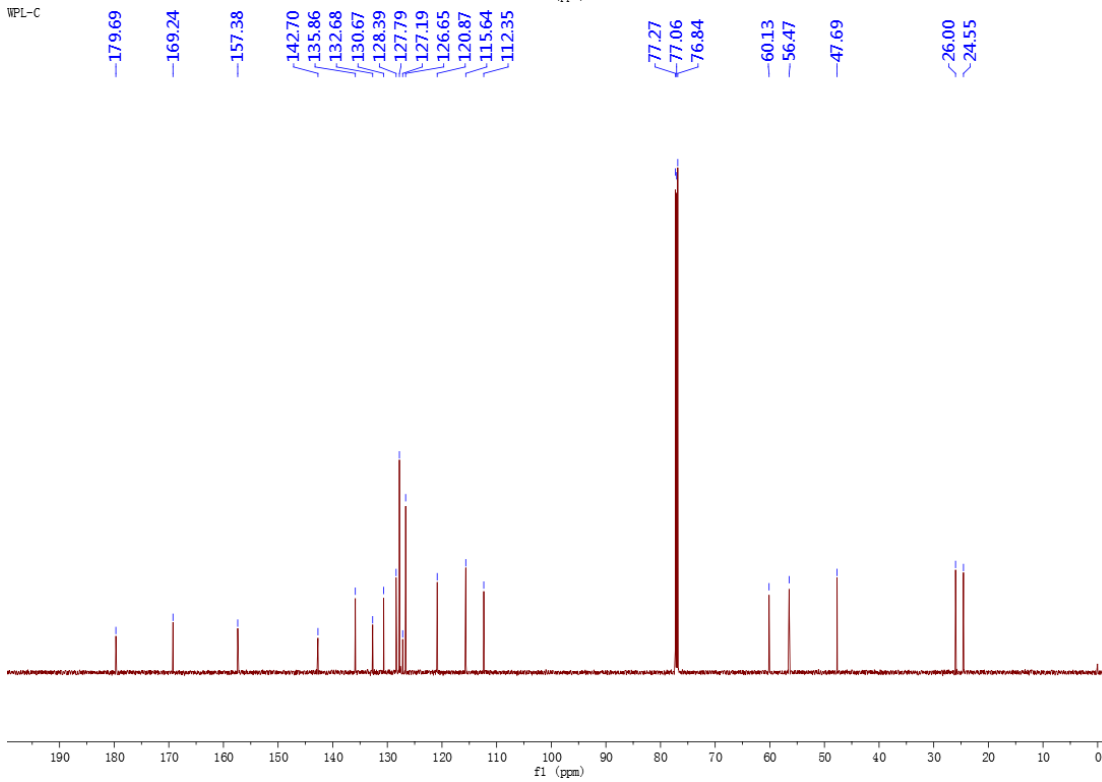

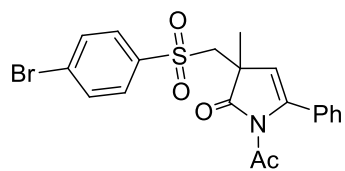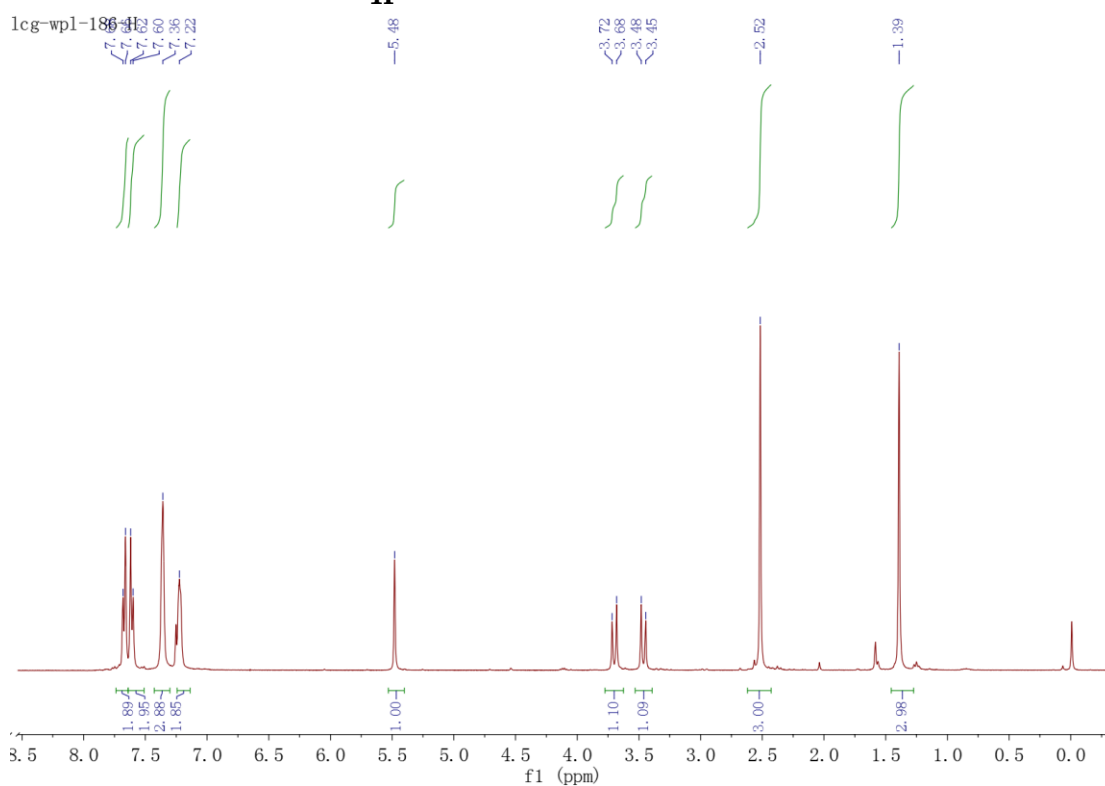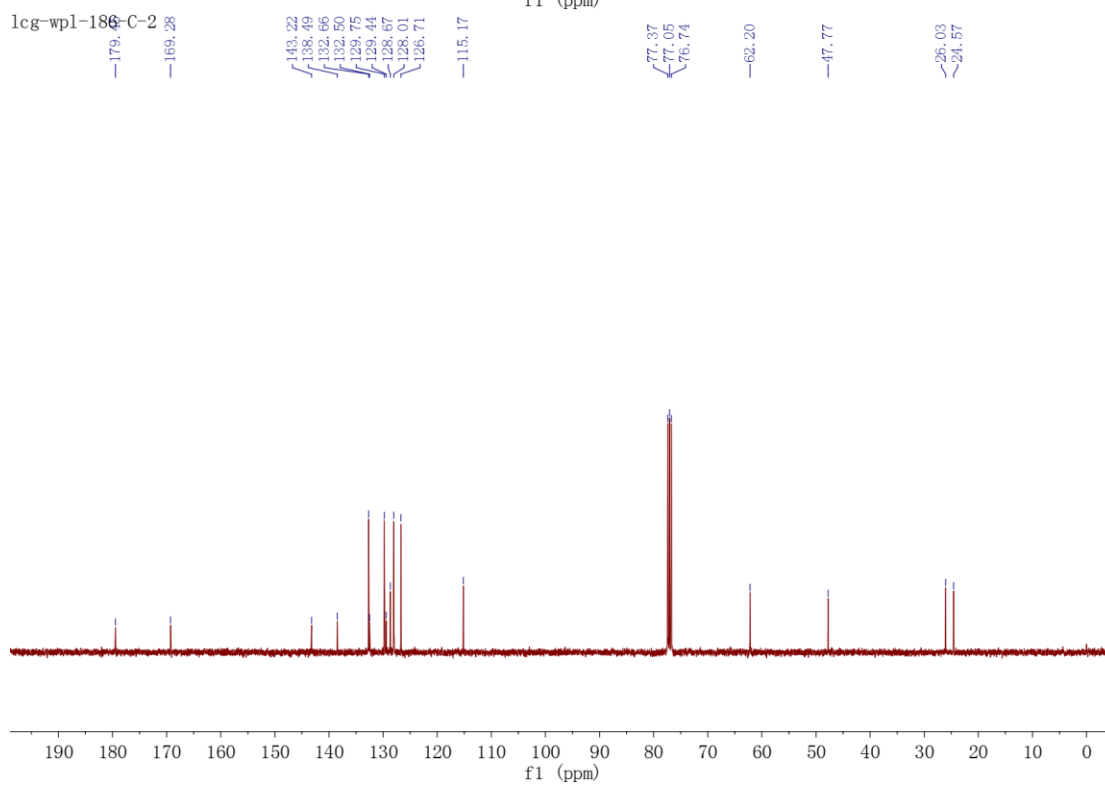

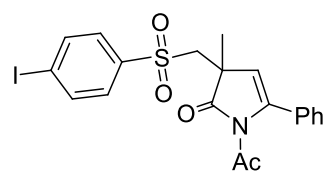

4g

WPL-H

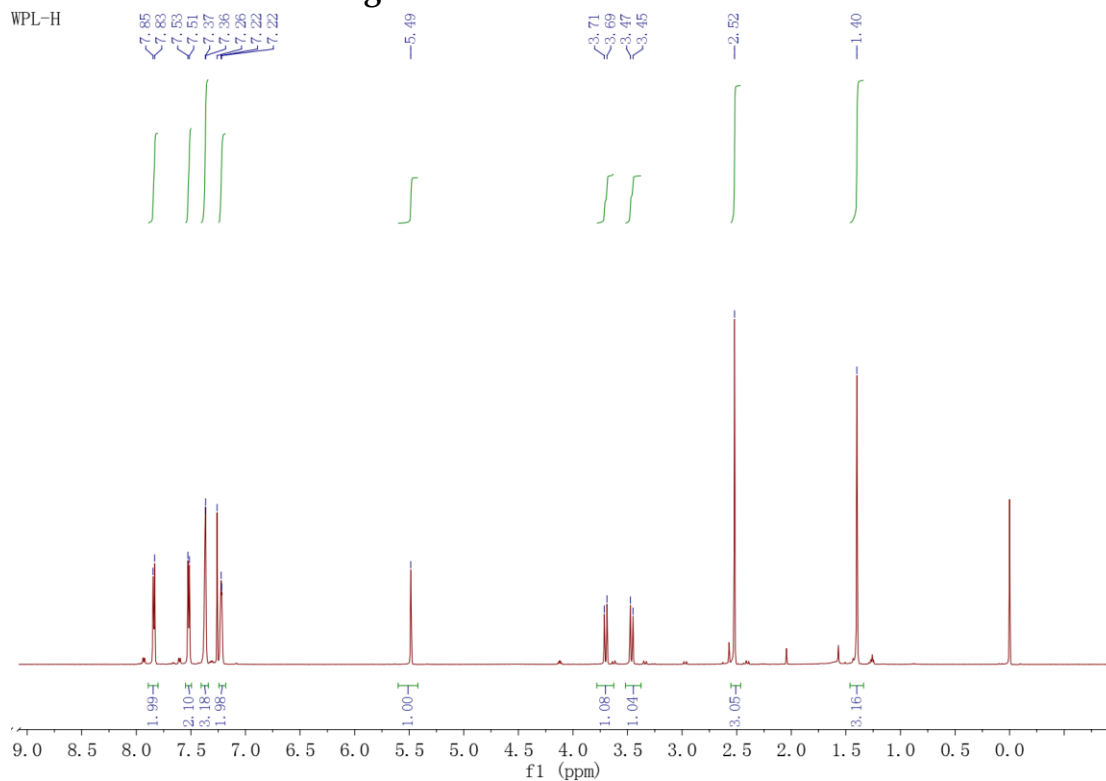

WPL-C

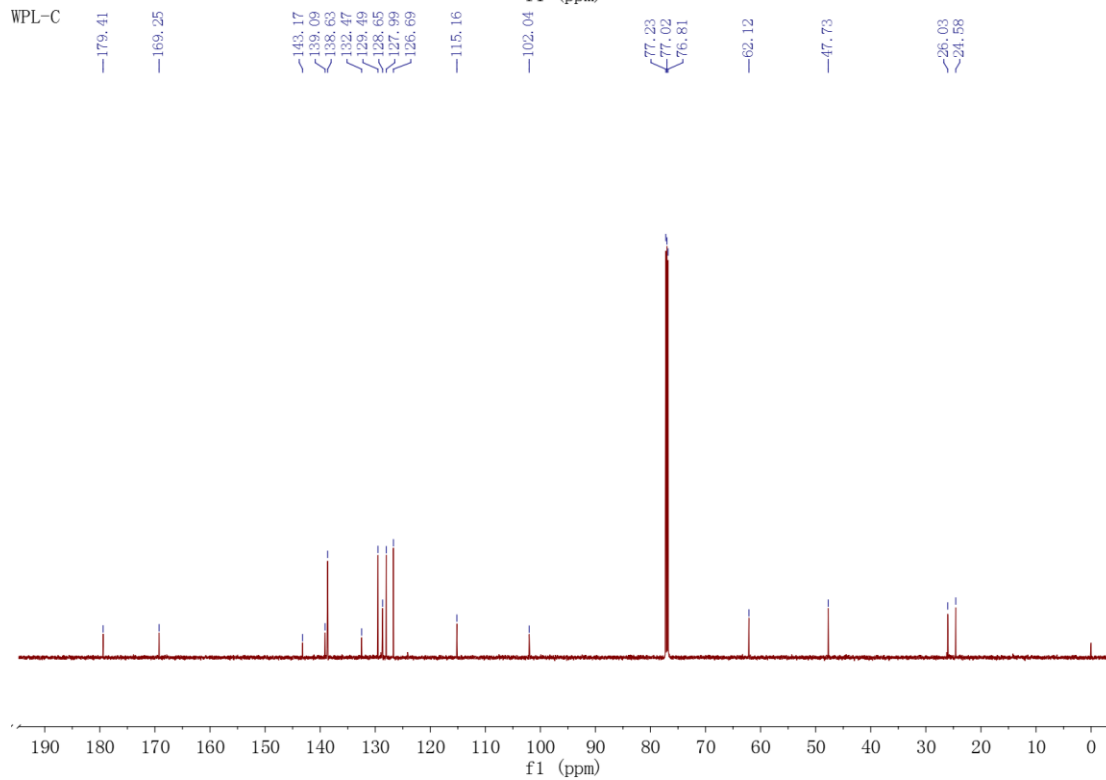

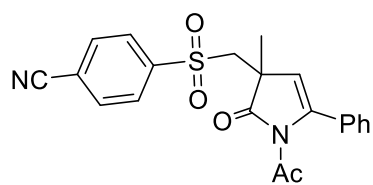

**4h**

WPL-H

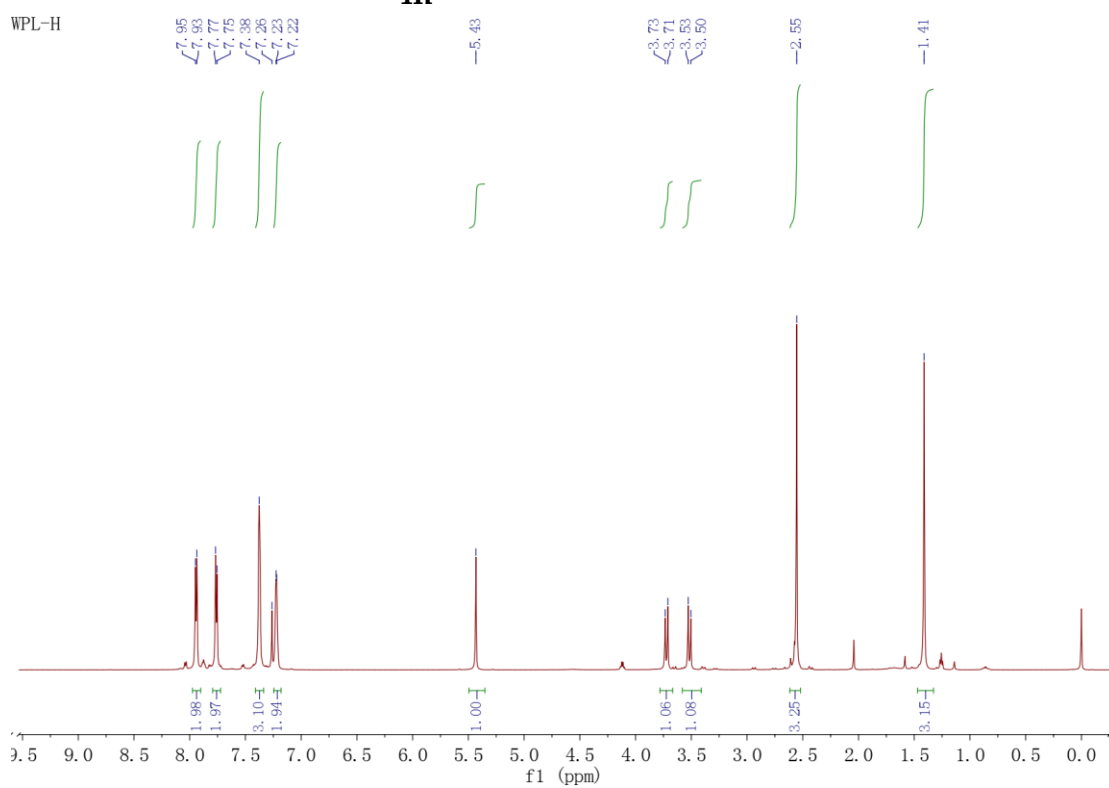

WPL-C

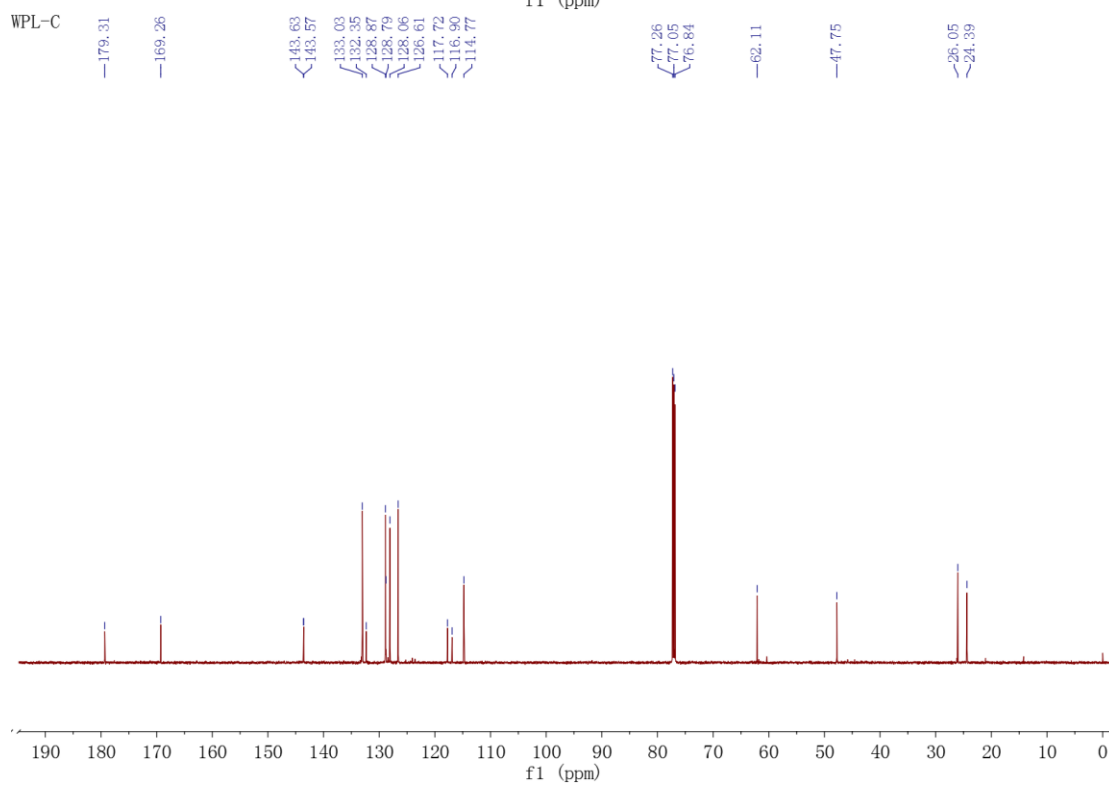

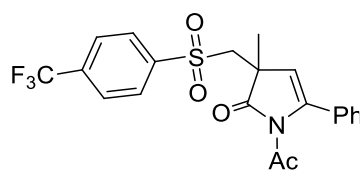

**4i**

RD-345

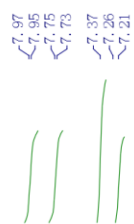

5.45

3.76  
3.72  
3.54  
3.50

2.52

1.41

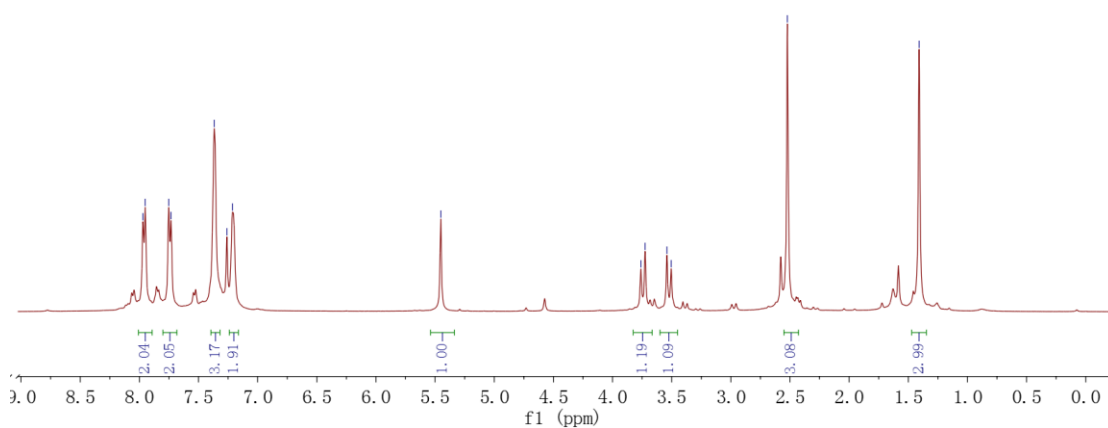

RD-345C

179.35  
169.30

143.37  
142.98  
132.38  
128.86  
128.74  
128.03  
126.63  
126.51  
126.48  
124.69

77.38  
77.27  
77.06  
76.75

62.08

47.74

26.03  
24.53

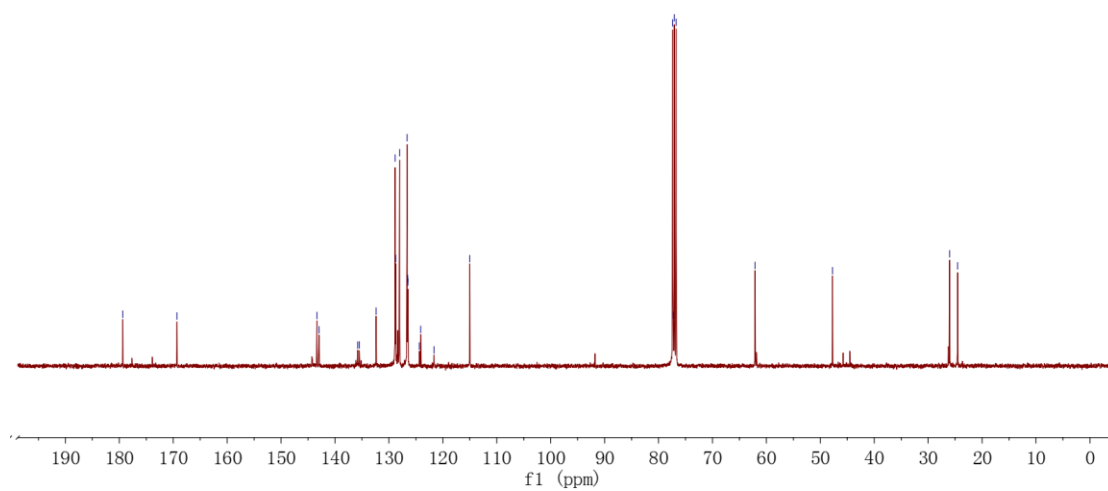

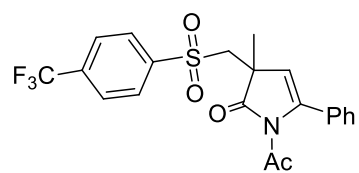

**4i**

RD-345F

— 63.25

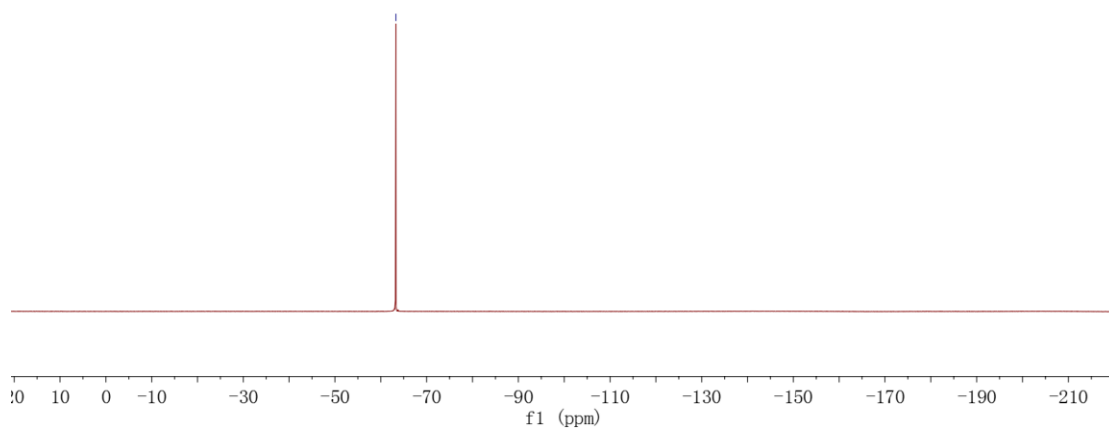

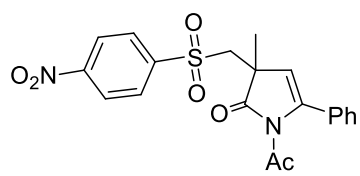

4j

lcg-rd-346-H

8.37, 8.28, 8.02, 8.00

7.37, 7.25, 7.23, 7.21

5.44

3.76, 3.72, 3.55, 3.52

2.55

1.41

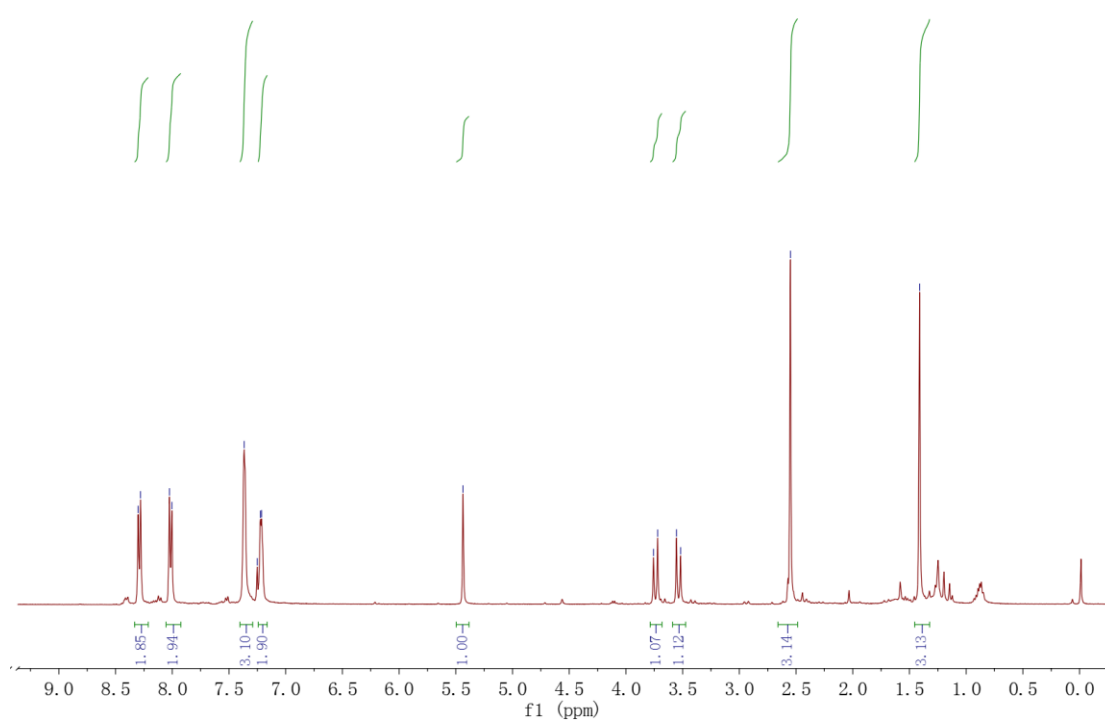

lcg-rd-346-C

179.27

169.27

150.85

145.06

143.63

132.28

129.62

128.80

128.06

126.57

124.44

114.68

77.35

77.03

76.71

62.16

47.75

26.05

24.38

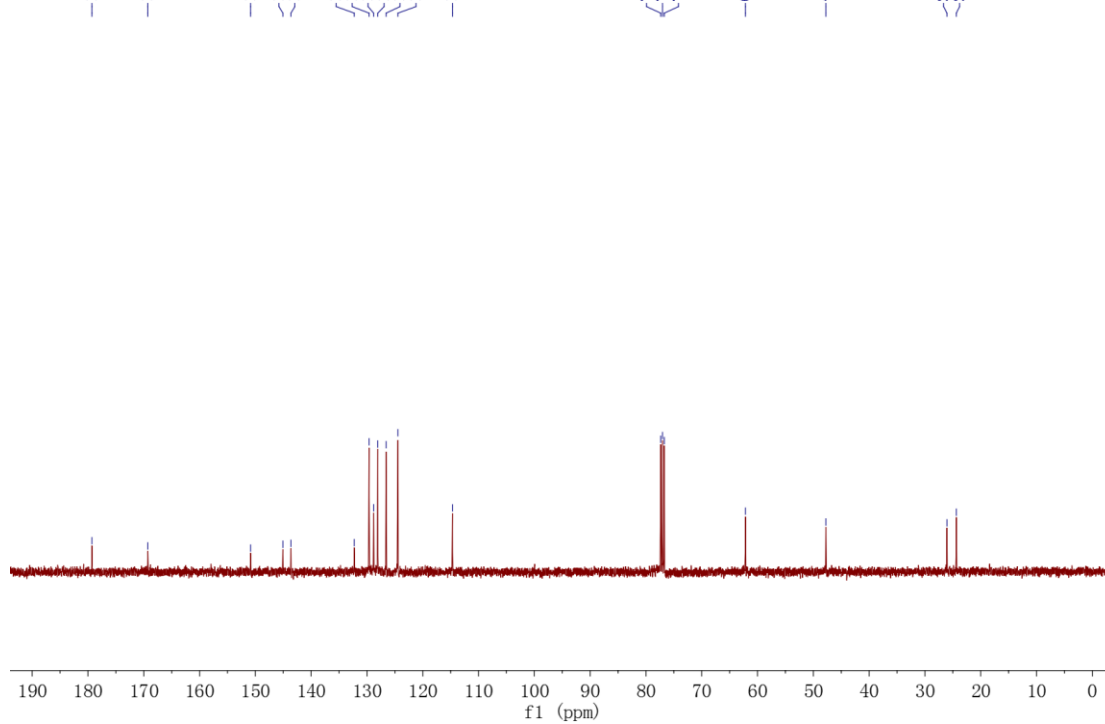

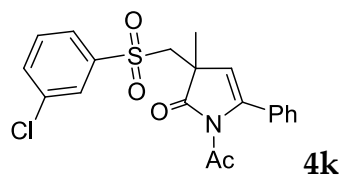

lcg-wpl-188-H  
Std proton

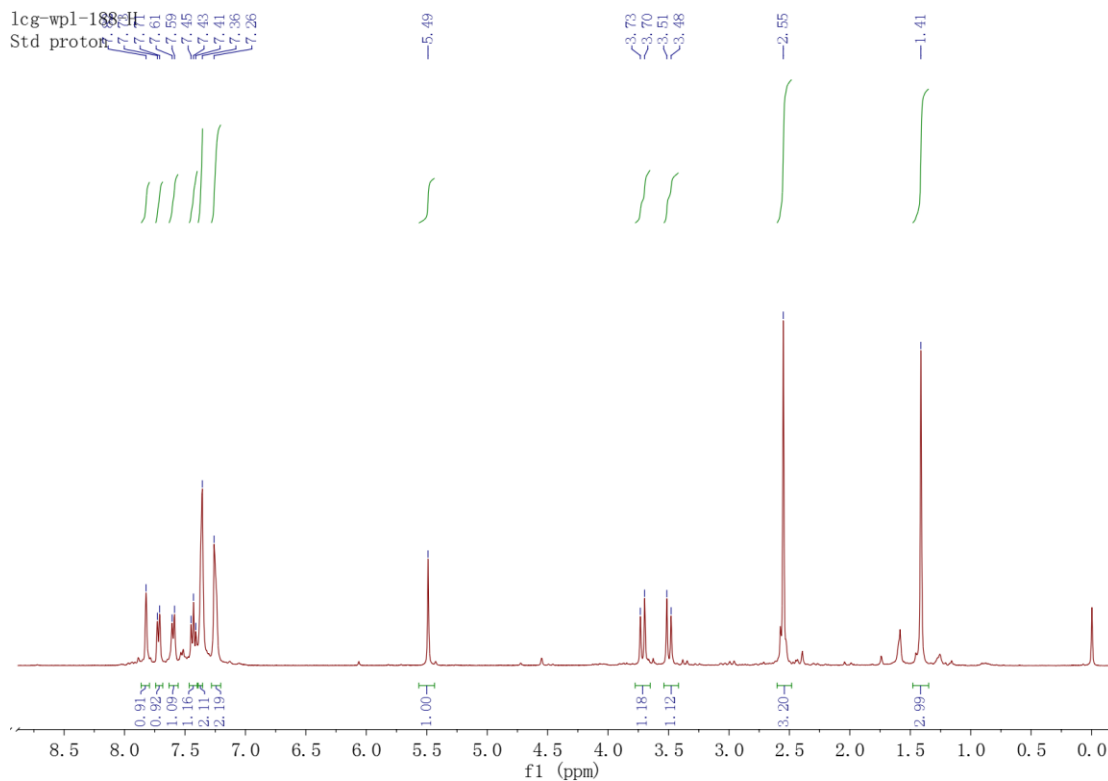

lcg-wpl-188-C  
Std carbon

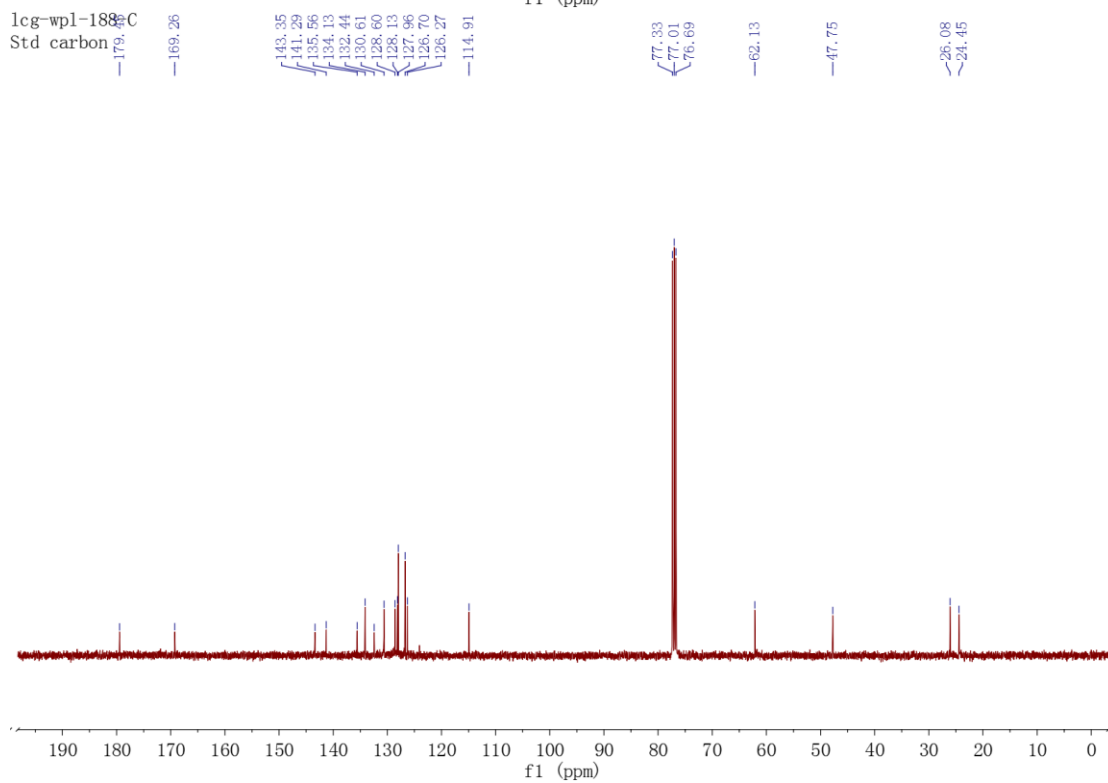



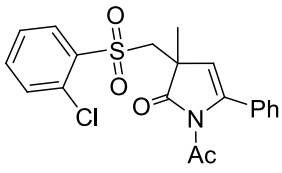

41

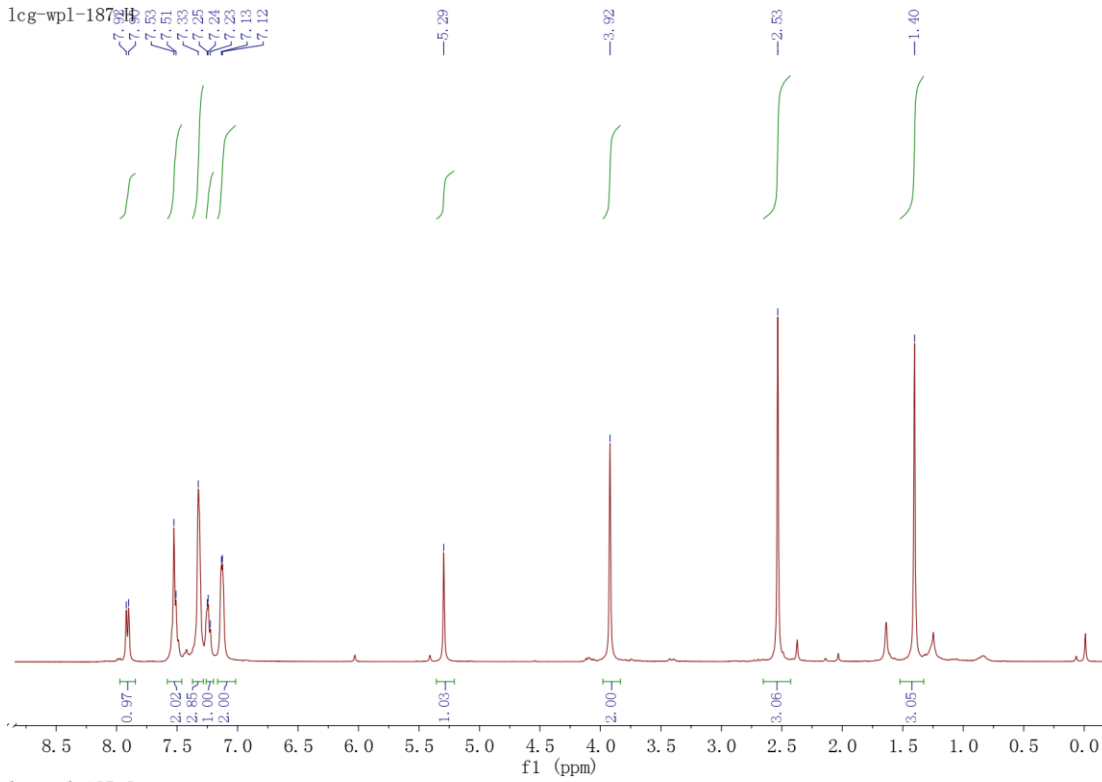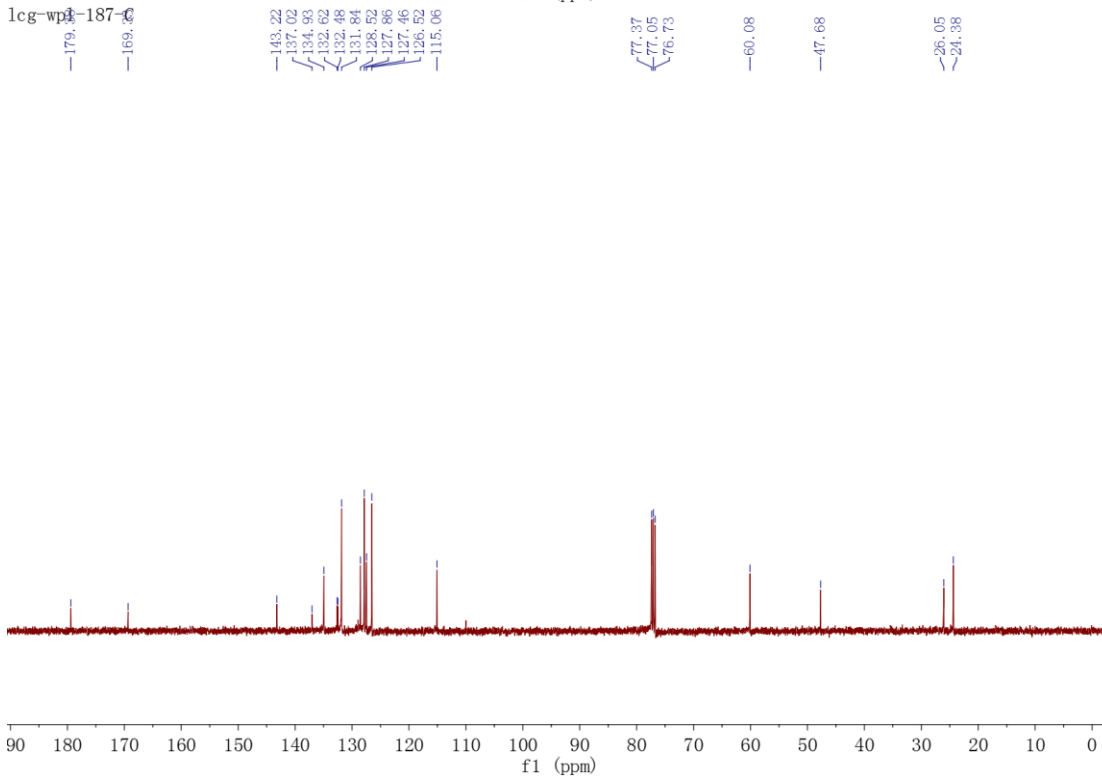

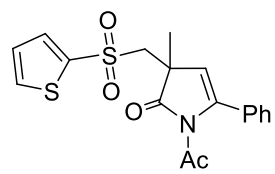

**4m**

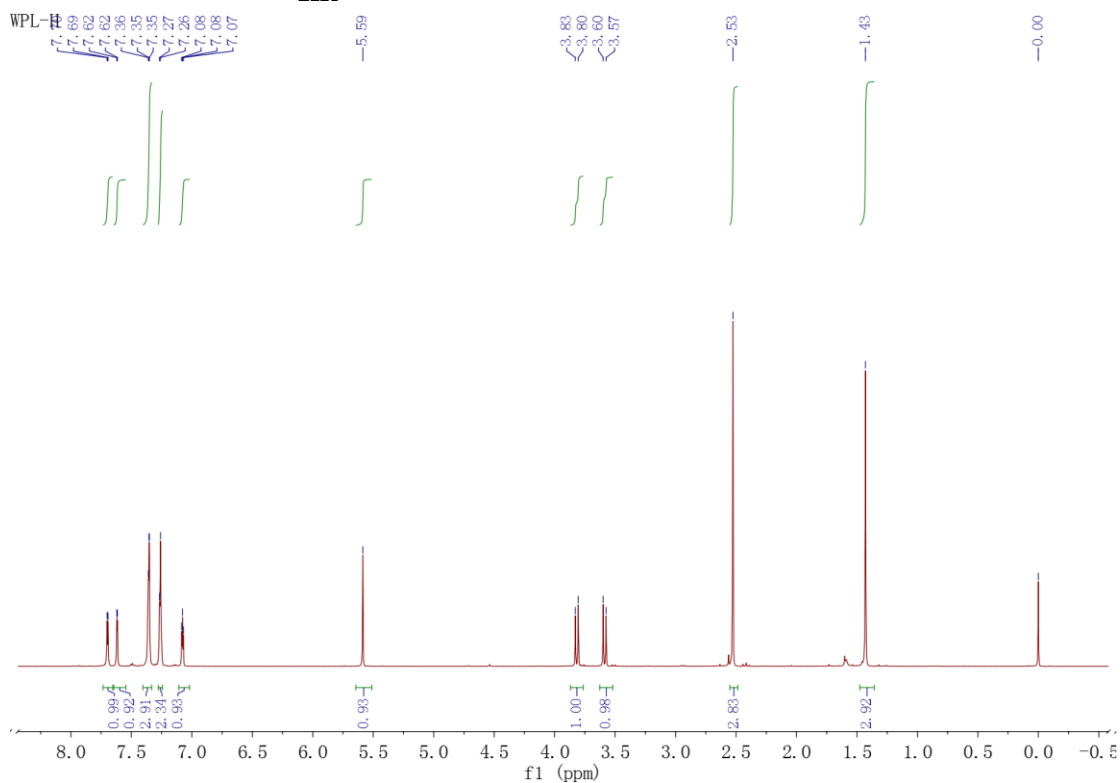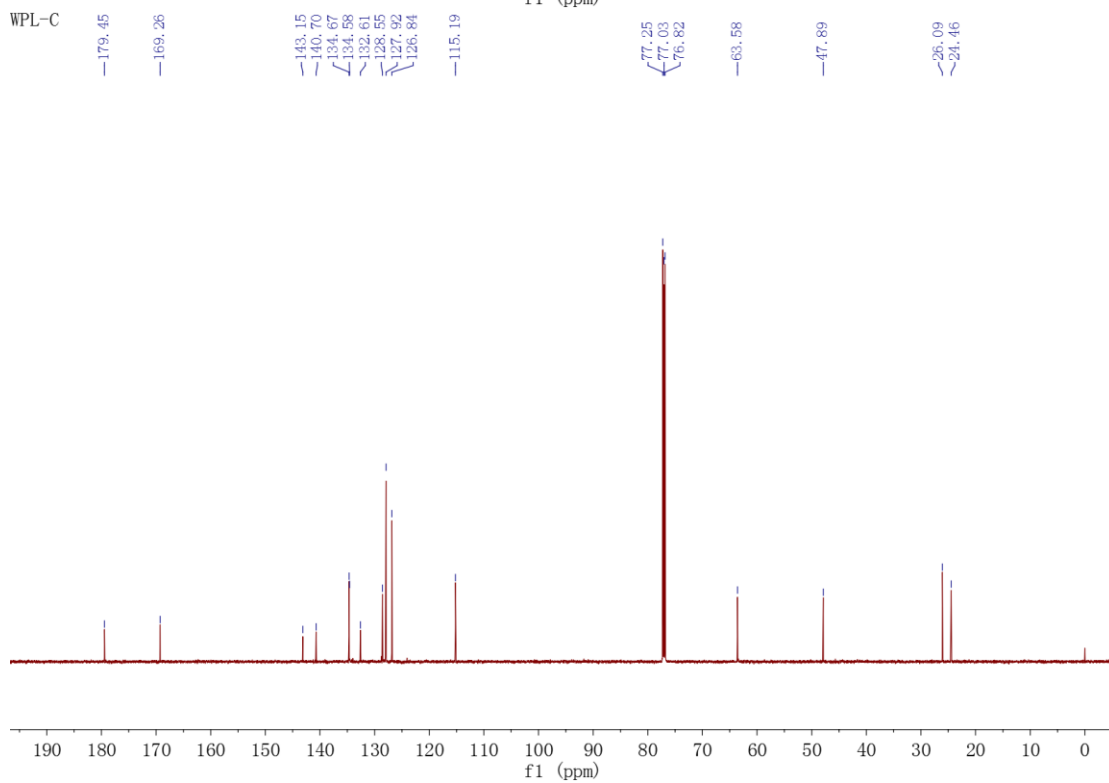

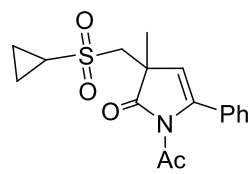

**4n**

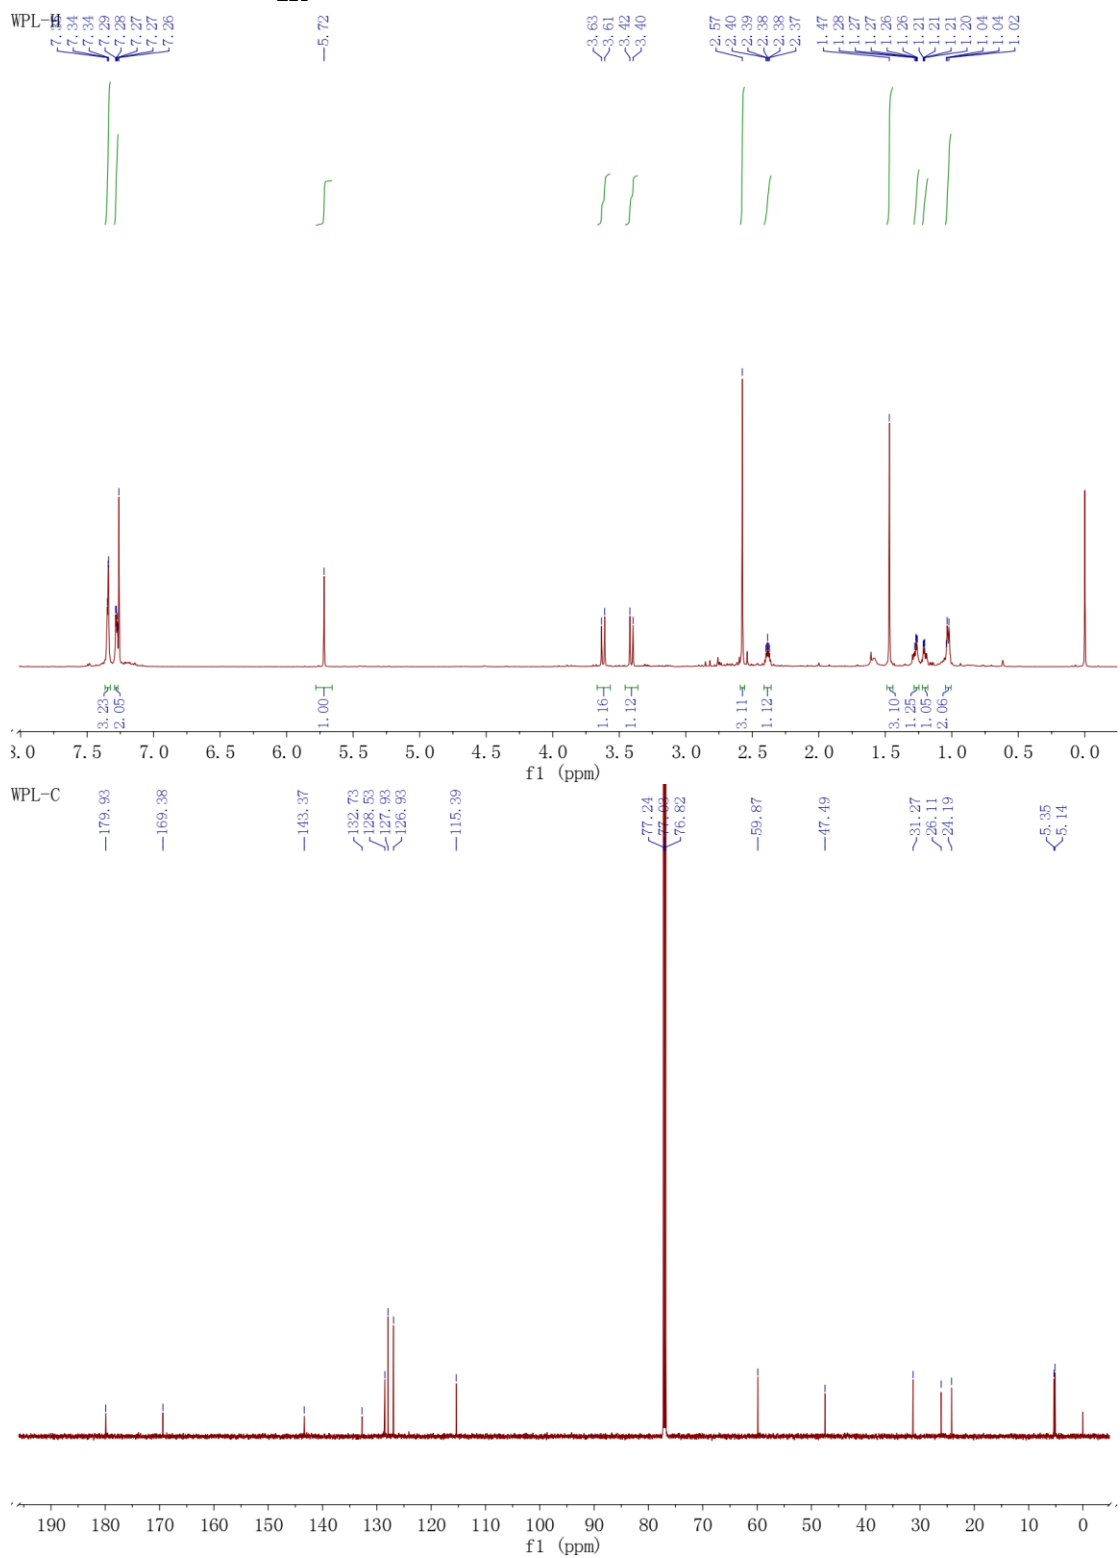

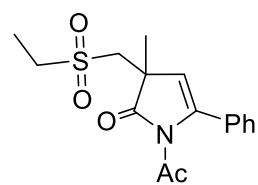

4o

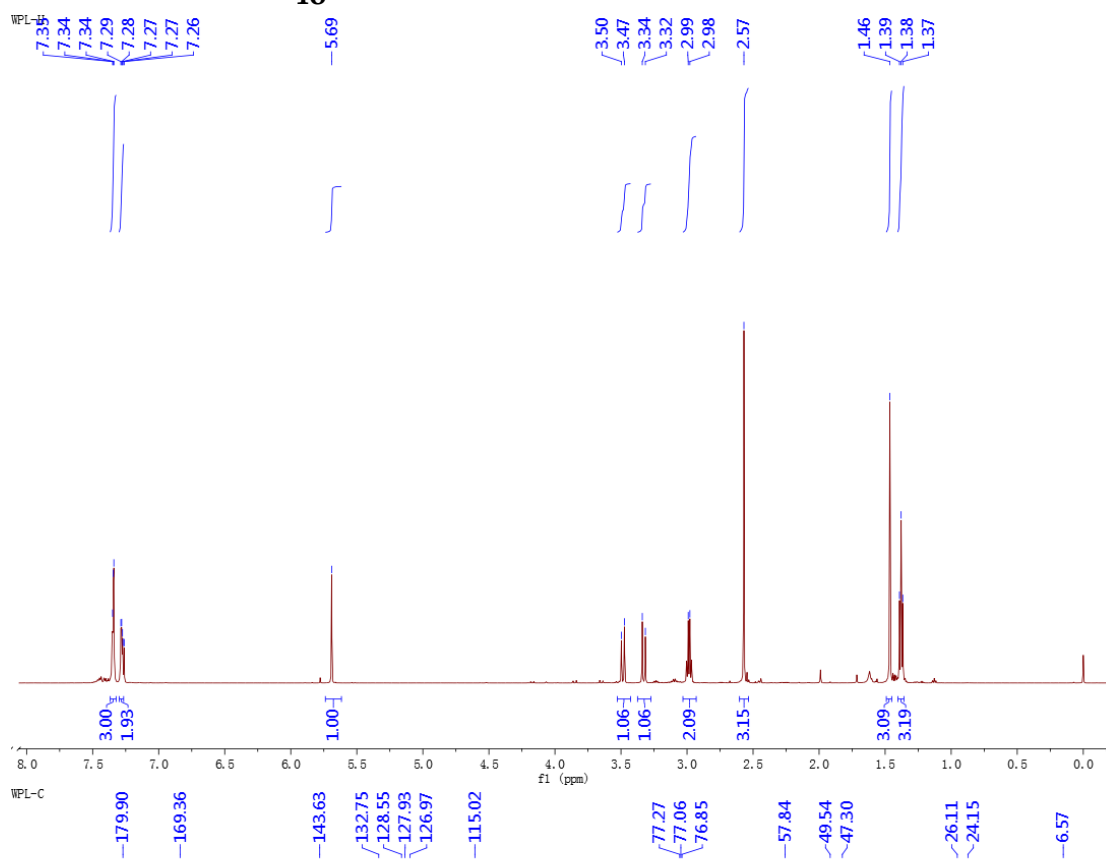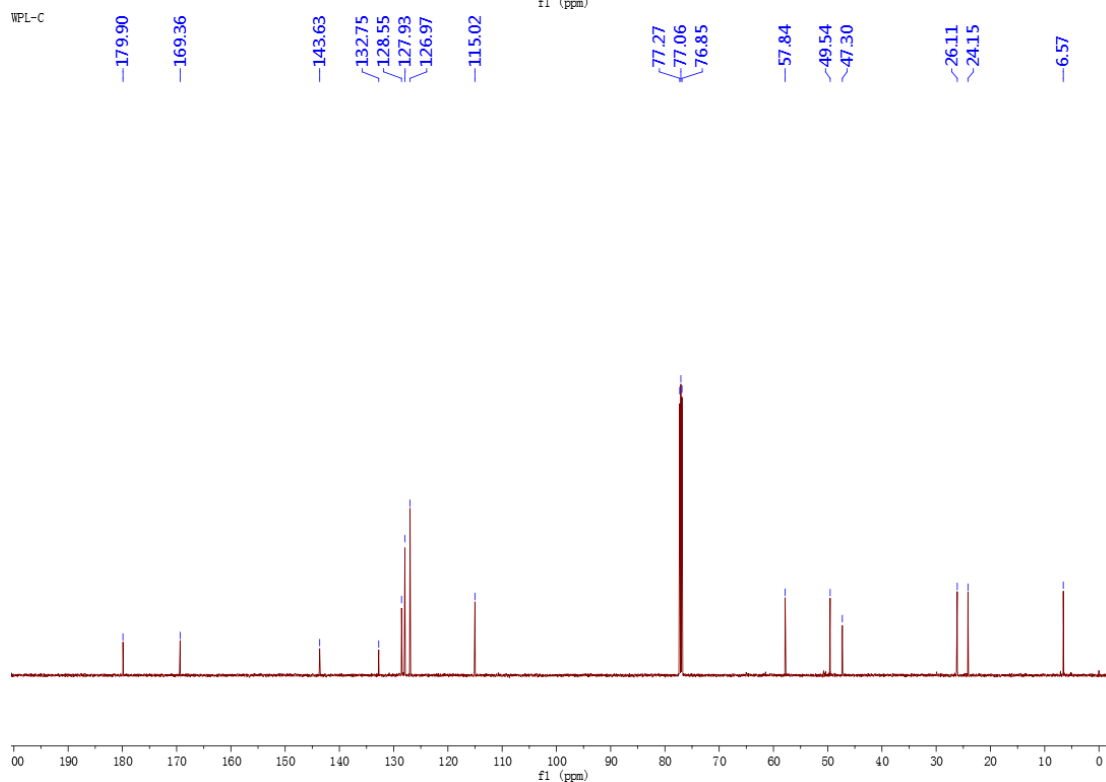

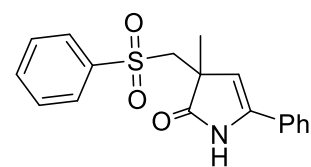

**4aa**

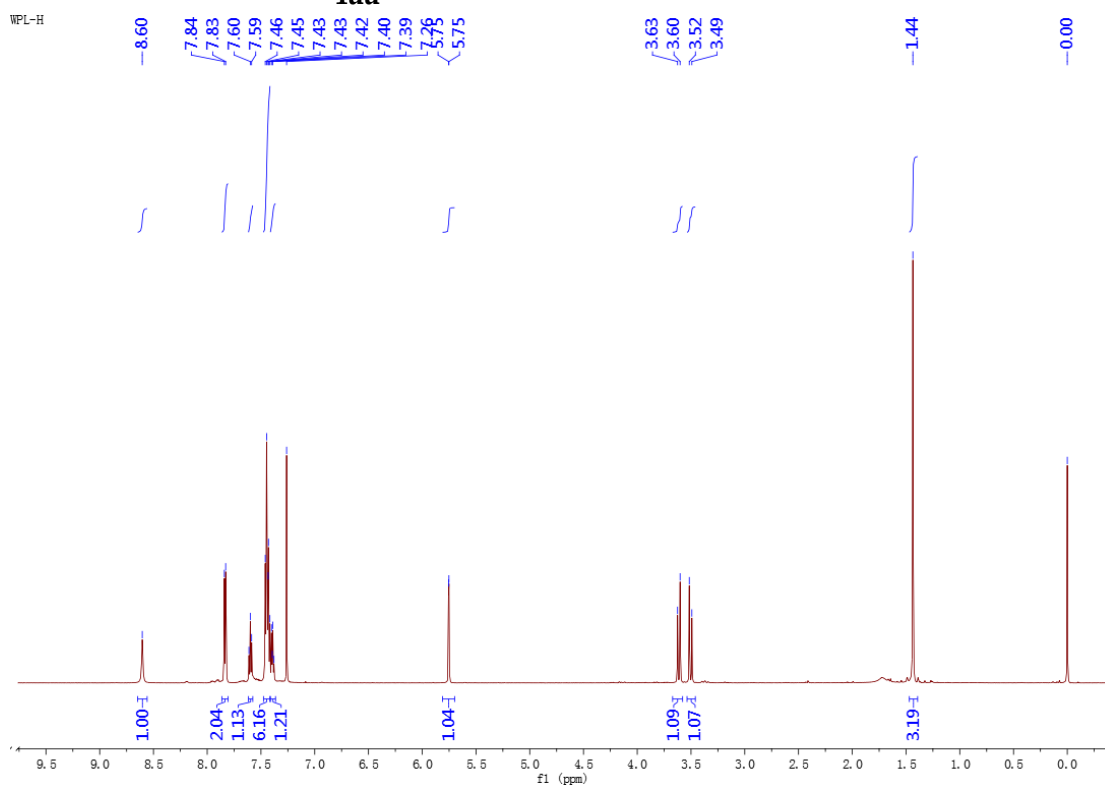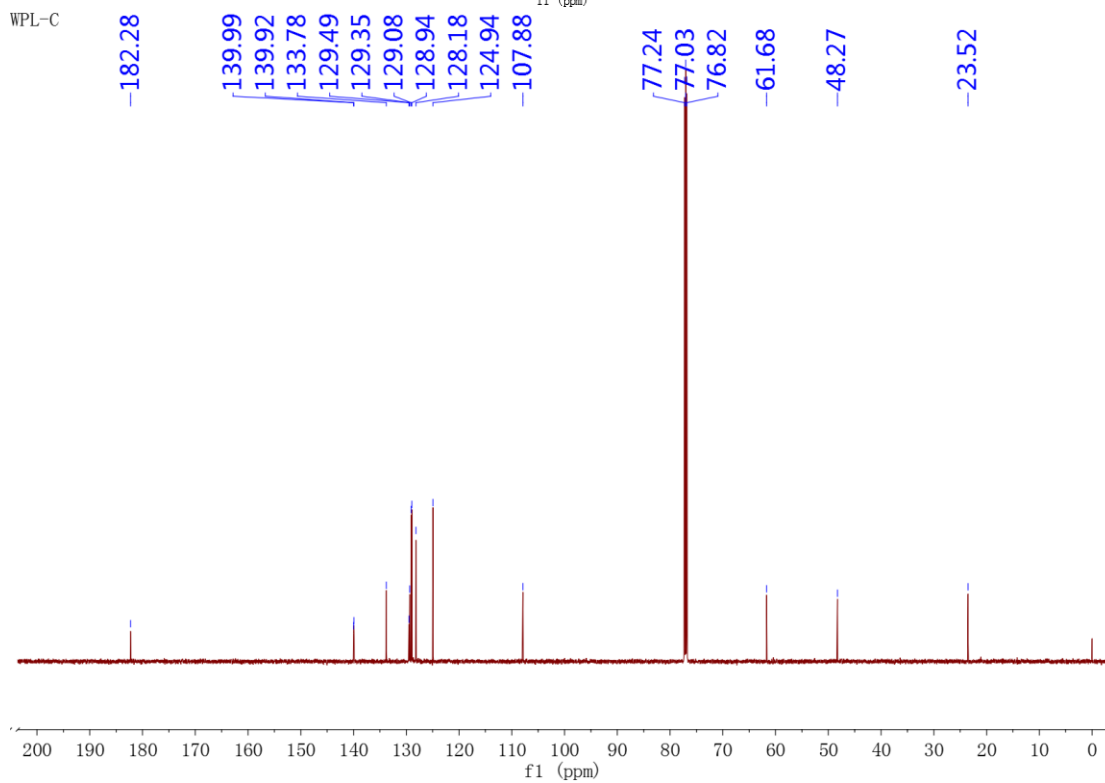

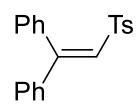

wp12-c

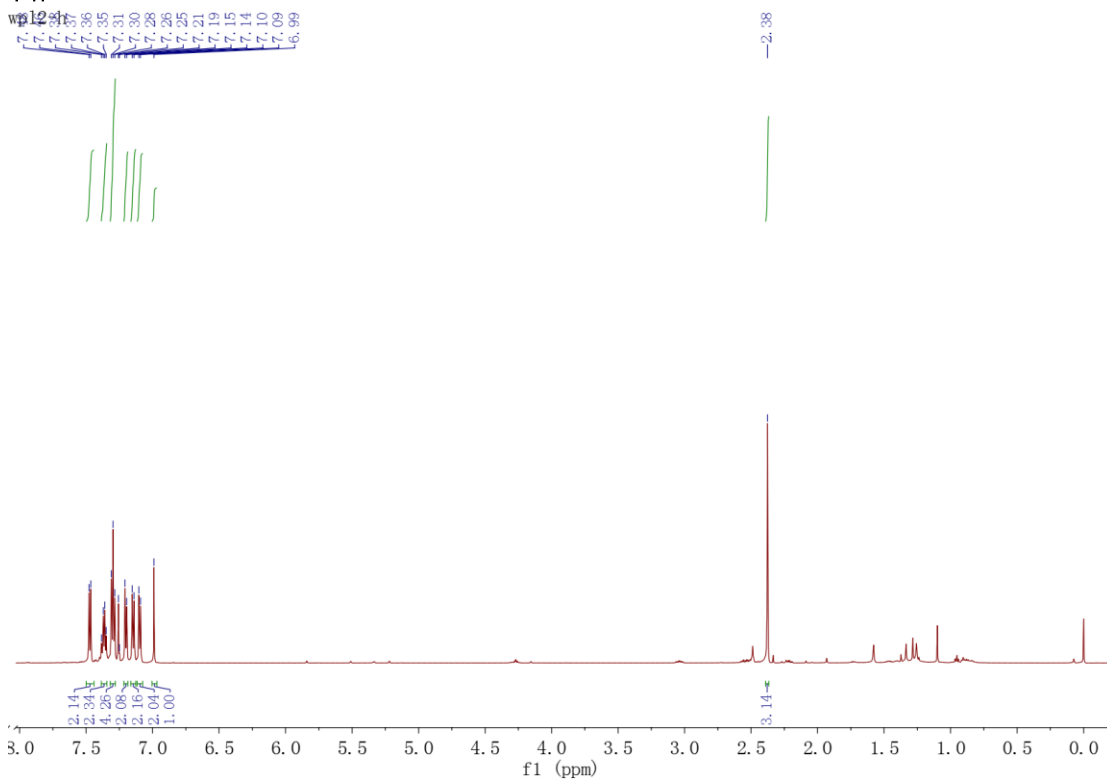

wp12-c

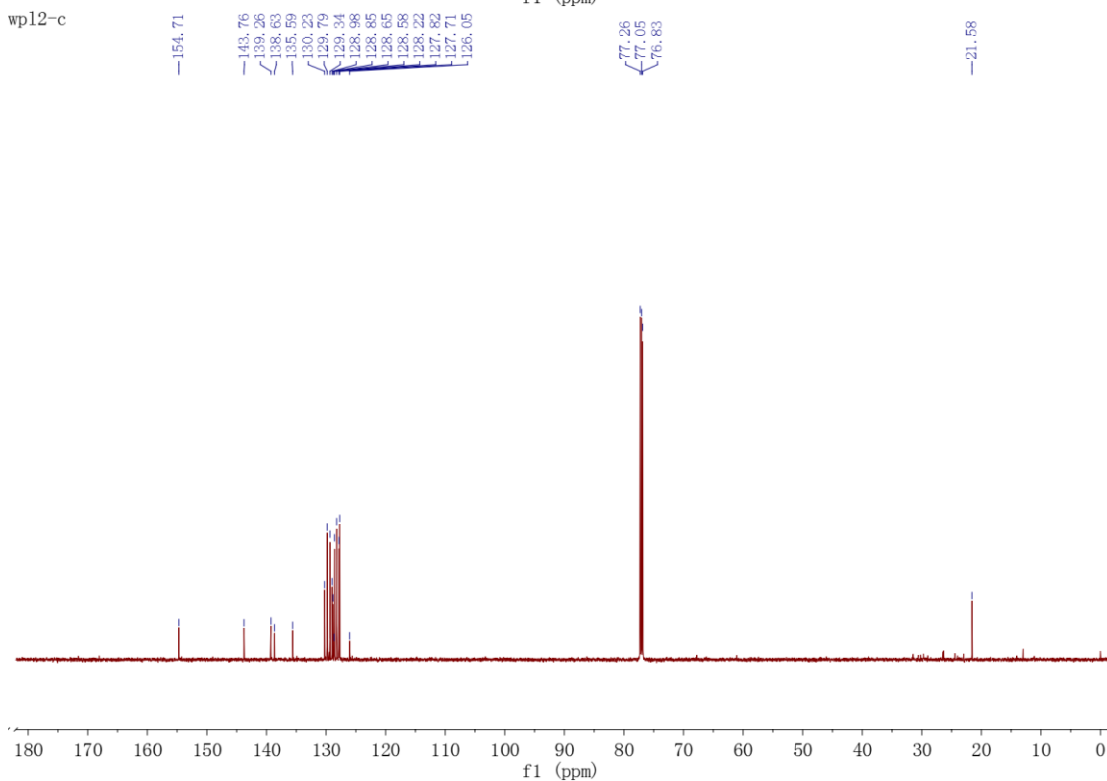

Supplement: s1 [file s1]
